# Supplementary material for: Characterization of primary cilia features reveal cell-type specific variability in in vitro models of osteogenic and chondrogenic differentiation
Source: PeerJ. 2020 Aug 21;8:e9799. doi: 10.7717/peerj.9799 (PMC7444507; doi:10.7717/peerj.9799)
Supplement: Supplemental Information 9 [file peerj-08-9799-s009.xlsx]

## Sheet: C3H10T1_2
	Uninduced									OS Induced
Day 7	0.058846	0.070272	0.079794	0	0	0	0	0	0	0.016949	0.066464	0.053133	0.000438	0	0	0	0	0
Day 14	0.49	0.18	0.15	0.0618785	0.086188	0.064088	0.02	0.02	0.03	1.48	3.14	2.95	0.724862	0.623204	0.687293	2.38	3.17	3.38
Day 21	0.189207	0.078599	0.029998	0.0130703	0.01307	0.11418	0.04	0.04	0.17	2.84716	0.562929	0.494218	5.05623	4.06486	6.19556	5.02	4.64	4.88
Cell-line: C3H10T1/2

## Sheet: MC3T3-E1
	Uninduced									OS Induced
Day 7	0	0.05	0	0	0	0	0	0	0	0.01	0.06	0.05	0	0	0	0	0	0
Day 14	0.0568638	0.076051	0.049887	0.04	0.04	0.04	0.04	0.04	0.04	0.14059	0.107448	0.117914	0.09	0.13	0.06	0.09	0.13	0.06
Day 21	0.063516	0.016591	0.031674	0	0	0	0.01	0.1	0.03	1.73437	3.60298	3.28959	6.11472	5.97514	5.32301	2.4	1.52	1.89
Cell-line: MC3T3-E1

## Sheet: ATDC5
	Uninduced						CH Induced
Day 7	0	0	0	0	0	0	0	0.002	0	0	0	0
Day 14	0.0001	0.00011	0.0001	0.121576	0.106567	0.117824	1.29583	3.18263	1.08774	1.44428	2.68067	2.3242
Day 21	0.03	0	0	0	0	0	3.4488	3.78901	3.80912	5.27834	4.06641	3.81684
Day 30	0	0	0	0	0	0	4.24043	3.82856	3.71529	8.00216	9.04422	9.30705
Cell-line: ATDC5
