# Supplementary material for: Characterization of primary cilia features reveal cell-type specific variability in in vitro models of osteogenic and chondrogenic differentiation
Source: PeerJ. 2020 Aug 21;8:e9799. doi: 10.7717/peerj.9799 (PMC7444507; doi:10.7717/peerj.9799)
Supplement: Supplemental Information 10 [file peerj-08-9799-s010.xlsx]

## Sheet: Alp
Day 0 uninduced	Day 7 OS induced	Day 14 OS induced	Day 21 OS induced
1.01097	5.418	29.3038	70.0851
1.86295	4.38741	22.416	85.8225
0.766561	4.09173	32.7352	50.119
0.716484	3.47086	25.2407	47.1888
Cell-line: C3H10T1/2
Target: Alp

## Sheet: Runx2
Day 0 uninduced	Day 7 OS induced	Day 14 OS induced	Day 21 OS induced
1.35219	2.30333	4.79301	5.12516
1.19943	2.90164	4.12238	3.61382
1.11395	1.75455	3.73886	2.52446
Cell-line: C3H10T1/2
Target: Runx2

## Sheet: Ptch1
Day 0 uninduced	Day 7 OS induced	Day 14 OS induced	Day 21 OS induced
1.48143	1.80448	7.00369	4.33716
1.38855	2.20767	8.53597	3.32169
1.16208	2.00715	4.7388	2.32919
Cell-line: C3H10T1/2
Target: Ptch1
