# Supplementary material for: Characterization of primary cilia features reveal cell-type specific variability in in vitro models of osteogenic and chondrogenic differentiation
Source: PeerJ. 2020 Aug 21;8:e9799. doi: 10.7717/peerj.9799 (PMC7444507; doi:10.7717/peerj.9799)
Supplement: Supplemental Information 12 [file peerj-08-9799-s012.xlsx]

## Sheet: 21 day CH
Uninduced - Adjusted intensity	21 days CH Induced - Adjusted intensity
731.8	1711.42
929.8	1236.44		Cell-line: ATDC5
821.8	827.21
400.8	1221.39
543.8	1126.48
1334.07	5505.86
1474.11	6223.4
1255.18	6743.34
883.1	5917.37
343.2	5989.7
1357.97	2433.51
716.684	1930.59
423.969	1517.87
637.343	3134.28
213.46	2898.51
612.41	2404.09
350.193	2790.51
603.061	2165.9
380.091	1957.41
821.543	2347.73
450.05	2434.41
774.06	2354.33
1469.15	2459.02
615.389	1408.52
1280.51	1310.21
709.045	1210.32
233.577	1423.67
483.333	1450.74
653.883	1816.86
838.262	1388.34
573.737	1421.29
1073.2	2303.45
737.084	2166.12
612.126	1316.73
717.016	1860.05
688.639	2775.34
928.168	1594.09
1403.14	1728.9
469.722	1521.57
580.499	1536.69
