# Supplementary material for: Characterization of primary cilia features reveal cell-type specific variability in in vitro models of osteogenic and chondrogenic differentiation
Source: PeerJ. 2020 Aug 21;8:e9799. doi: 10.7717/peerj.9799 (PMC7444507; doi:10.7717/peerj.9799)
Supplement: Supplemental Information 13 [file peerj-08-9799-s013.xlsx]

## Sheet: Sox9
Day 0	Day 7 CH induced	Day 14 CH induced	Day 21 CH induced
1.96859	29.9583	6.56659	3.12085
1.33754	30.2876	8.16807	3.29043
2.60274	37.2994	8.21769	8.1699
Cell-line: ATDC5
Target Sox9

## Sheet: Mmp13
Day 0	Day 7 CH induced	Day 14 CH induced	Day 21 CH induced
1.1069	18.207	12.785	40.3358
1.03866	17.6225	10.0626	44.4811
1.30954	18.465	16.5284	48.2526
Cell-line ATDC5
Target: Mmp13
