# Supplementary material for: Characterization of primary cilia features reveal cell-type specific variability in in vitro models of osteogenic and chondrogenic differentiation
Source: PeerJ. 2020 Aug 21;8:e9799. doi: 10.7717/peerj.9799 (PMC7444507; doi:10.7717/peerj.9799)
Supplement: Supplemental Information 14 [file peerj-08-9799-s014.xlsx]

## Sheet: ATDC5 day 0 no ss
Sl no.	Cell line	Treatment type	Day	Cilia length (acTub)	Comments
							pixel: 0.07206 um
1	ATDC5	none	0	2.5	mid upper - image 1a	set 1	1 um: 13.877 pixels
2	ATDC5	none	0	2.8	below no. 1 - image 1a
3	ATDC5	none	0	2.4	leftish lower mid - image 1a
4	ATDC5	none	0	2.5	left upper mid -image 1a
5	ATDC5	none	0	2.7	left of no. 4 - image 1a
6	ATDC5	none	0	3.1	mid left edge - image 1a
7	ATDC5	none	0	2.9	lower right of no. 6 - image 1a
8	ATDC5	none	0	3.8	right lower corner - image 1a
9	ATDC5	none	0	2.7	below no. 8 - image 1a
10	ATDC5	none	0	2.4	right mid - image 1a
11	ATDC5	none	0	2.4	below no. 10 - image 1a
12	ATDC5	none	0	2.9	top left upper - image 2a
13	ATDC5	none	0	2.8	rightist upper mid - image 2a
14	ATDC5	none	0	2.7	right of no. 13 - image 2a
15	ATDC5	none	0	3.4	right of no. 13 - image 2a
16	ATDC5	none	0	2.8	below no. 15 - image 2a
17	ATDC5	none	0	2.3	below no. 13 - image 2a
18	ATDC5	none	0	2.5	below no. 17 - image 2a
19	ATDC5	none	0	2.8	left mid - image 2a
20	ATDC5	none	0	2.7	left lower edge - image 2a
21	ATDC5	none	0	2.7	mid bottom edge - image 2a
22	ATDC5	none	0	2.3	above no. 21 - image 2a
23	ATDC5	none	0	2.6	above rightish no. 22 - image 2a
24	ATDC5	none	0	2.4	top right edge - image 3a
25	ATDC5	none	0	2.2	mid rightish - image 3b
26	ATDC5	none	0	2.6	left mid - image 3b
27	ATDC5	none	0	2.4	below no. 26 - image 3b
28	ATDC5	none	0	2.8	mid bottom edge - image 3b
29	ATDC5	none	0	2.3	right lower mid - image 3b
30	ATDC5	none	0	2.4	right bottom - image 3b
31	ATDC5	none	0	2.5	rightish mid duo - image 4a
32	ATDC5	none	0	2.6	rightish mid duo - image 4a
33	ATDC5	none	0	2.3	left mid -image 4a
34	ATDC5	none	0	2.8	top mid edge - image 4b
35	ATDC5	none	0	2.9	top rightish - image 4b
36	ATDC5	none	0	3.2	right lower edge - image 4b
37	ATDC5	none	0	2.6	below no. 36 - image 4b
38	ATDC5	none	0	3.4	left of no. 37 - image 4b
39	ATDC5	none	0	2.3	mid lower - image 4b
40	ATDC5	none	0	2.7	left upper mid - image 4b
41	ATDC5	none	0	2.3	left upper corner - image 4b
42	ATDC5	none	0	2.8	left lower corner - image 4b
43	ATDC5	none	0	2.2	mid - image 5a	set 2
44	ATDC5	none	0	2.8	left upper - image 5b
45	ATDC5	none	0	3.2	left upper corner - image 5b
46	ATDC5	none	0	2.6	left bottom - image 5b
47	ATDC5	none	0	2.3	right mid trio - image 5b
48	ATDC5	none	0	2.3	right mid trio - image 5b
49	ATDC5	none	0	2.5	right mid trio - image 5b
50	ATDC5	none	0	2.5	right lower edge duo - image 5b
51	ATDC5	none	0	2.5	right lower edge duo - image 5b
52	ATDC5	none	0	3.2	right mid duo - image6a
53	ATDC5	none	0	2.4	right mid duo - image 6a
54	ATDC5	none	0	3.4	right lower corner - image 6a
55	ATDC5	none	0	2.5	left mid edge - image 6b
56	ATDC5	none	0	3	below no. 56 - image 6b
57	ATDC5	none	0	2.3	below no. 56 - image 6b
58	ATDC5	none	0	2.4	below no. 57 - image 6b
59	ATDC5	none	0	2.4	right of no. 58 duo - image 6b
60	ATDC5	none	0	2.5	right of no. 58 duo - image 6b
61	ATDC5	none	0	2.8	right mid edge - image 7b
62	ATDC5	none	0	2.2	rightish mid - image 7b
63	ATDC5	none	0	3.3	below no. 63 - image 7b
64	ATDC5	none	0	3.2	upper left mid - image 7b
65	ATDC5	none	0	2.9	upper left corner - image 7b
66	ATDC5	none	0	2.8	left mid edge - image 7b
67	ATDC5	none	0	2.4	right of no. 66 - image 7b
68	ATDC5	none	0	2.3	mid upper - image 8b
69	ATDC5	none	0	3	mid - image 8a
70	ATDC5	none	0	2.7	right of no. 69 - image 8a
71	ATDC5	none	0	2.7	right lower edge - image 8a
72	ATDC5	none	0	2.8	left mid edge - image 8a
73	ATDC5	none	0	2.8	left upper corner - image 8a
74	ATDC5	none	0	2.4	mid bottom - image 8a
75	ATDC5	none	0	3.1	upper mid edge - image 9a
76	ATDC5	none	0	2.6	mid
77	ATDC5	none	0	2.7	right lower corner - image 9a
78	ATDC5	none	0	2.7	lower right corner - image 10a
79	ATDC5	none	0	2.8	right mid edge - image 10b
80	ATDC5	none	0	2.7	right bottom - image 10b
81	ATDC5	none	0	2.9	mid - image 10b
82	ATDC5	none	0	2.6	above no. 81 - image 10b
83	ATDC5	none	0	2.7	below no. 82 - image 10b
84	ATDC5	none	0	2.6	left lower - image 10b
85	ATDC5	none	0	2.6	left mid edge - image 10b
86	ATDC5	none	0	2.6	mid - image 11a
87	ATDC5	none	0	3.2	lower leftish mid - image 11a
88	ATDC5	none	0	2.2	left lower corner - image 11a
89	ATDC5	none	0	2.3	top right corner trio - image 11a
90	ATDC5	none	0	2.4	top right corner trio - image 11a
91	ATDC5	none	0	3	mid - image 12
92	ATDC5	none	0	3.1	right mid edge - image 12
93	ATDC5	none	0	2.7	below no. 92 - image 12
94	ATDC5	none	0	3	mid bottom - image 12
95	ATDC5	none	0	2.6	leftish mid lower - image 12
96	ATDC5	none	0	2.4	left top - image 12
97	ATDC5	none	0	3	left top corner - image 13b
98	ATDC5	none	0	2.8	right top - image 13a
99	ATDC5	none	0	3	mid bottom - image 13a
100	ATDC5	none	0	2.7	left bottom corner - image 13a
101	ATDC5	none	0	2.7	right of no. 100 - image 13a
102	ATDC5	none	0	2.7	top right edge - image 14
103	ATDC5	none	0	2.5	left bottom - image 14
104	ATDC5	none	0	2.3	left bottom - image 14
105	ATDC5	none	0	2.7	right of no. 104 - image 14
106	ATDC5	none	0	3.1	right mid - image 15a
107	ATDC5	none	0	2.7	below no. 105 - image 15a
108	ATDC5	none	0	2.6	left lower - image 15a
109	ATDC5	none	0	2.4	rightish bottom - image 15a
110	ATDC5	none	0	2.3	left bottom corner - image 15a

## Sheet: ATDC5 day 0
Sl no.	Cell line	Treatment type	Day	Cilia length	Comments
1	ATDC5	uninduced & ss	0	2.78	mid - image 1	set 1	pixel: 0.07206 um
2	ATDC5	uninduced & ss	0	1.98	left bottom - image 1		1 um: 13.877 pixels
3	ATDC5	uninduced & ss	0	2.25	top left - image 1
4	ATDC5	uninduced & ss	0	3.22	mid - image 2		ss: serum starved
5	ATDC5	uninduced & ss	0	2	bottom - image 2
6	ATDC5	uninduced & ss	0	2.27	right mid - image 3
7	ATDC5	uninduced & ss	0	2.98	mid - image 3
8	ATDC5	uninduced & ss	0	2.81	left bottom - image 3
9	ATDC5	uninduced & ss	0	2.43	left top - image 3
10	ATDC5	uninduced & ss	0	2.06	bottom - image 3
11	ATDC5	uninduced & ss	0	2.32	top right - image 3
12	ATDC5	uninduced & ss	0	3.16	mid - image 4
13	ATDC5	uninduced & ss	0	2.47	left - image 4
14	ATDC5	uninduced & ss	0	2.58	left - image 4
15	ATDC5	uninduced & ss	0	2.3	top left - image 4
16	ATDC5	uninduced & ss	0	2.28	bottom left - image 4
17	ATDC5	uninduced & ss	0	2.54	bottom left - image 5
18	ATDC5	uninduced & ss	0	2.79	top left - image 5
19	ATDC5	uninduced & ss	0	3.39	mid - image 5
20	ATDC5	uninduced & ss	0	2.6	mid - image 6
21	ATDC5	uninduced & ss	0	1.81	right mid - image 6
22	ATDC5	uninduced & ss	0	1.9	left of no. 20 - image 6
23	ATDC5	uninduced & ss	0	1.84	left mid - image 6
24	ATDC5	uninduced & ss	0	1.84	below no. 22 - image 6
25	ATDC5	uninduced & ss	0	3.08	bottom - image 7
26	ATDC5	uninduced & ss	0	3.41	mid - image 7
27	ATDC5	uninduced & ss	0	3.1	right of no. 25 - image 7
28	ATDC5	uninduced & ss	0	1.86	right mid - image 8
29	ATDC5	uninduced & ss	0	2.36	right - above 27 - image 8
30	ATDC5	uninduced & ss	0	2.66	mid - image 8
31	ATDC5	uninduced & ss	0	2.05	below 30 - image 8
32	ATDC5	uninduced & ss	0	1.81	left mid - image 8
33	ATDC5	uninduced & ss	0	1.91	top right - image 8
34	ATDC5	uninduced & ss	0	2.19	top left - image 9
35	ATDC5	uninduced & ss	0	2.4	right of no. 33 - image 9
36	ATDC5	uninduced & ss	0	2.52	mid - image 9
37	ATDC5	uninduced & ss	0	3.35	left above 36 - image 9
38	ATDC5	uninduced & ss	0	2.35	mid - image 10
39	ATDC5	uninduced & ss	0	1.5	right bottom - image 10
40	ATDC5	uninduced & ss	0	1.4	right mid - image 10
41	ATDC5	uninduced & ss	0	1.84	top right - image 10
42	ATDC5	uninduced & ss	0	2.55	left mid - image 10
43	ATDC5	uninduced & ss	0	2.82	middle - image 11	set 2
44	ATDC5	uninduced & ss	0	2.76	left middle - image 11
45	ATDC5	uninduced & ss	0	2.41	lower middle - image 11
46	ATDC5	uninduced & ss	0	2.76	middle - image 12
47	ATDC5	uninduced & ss	0	2.84	mid lower - 12
48	ATDC5	uninduced & ss	0	2.48	right mid - 12
49	ATDC5	uninduced & ss	0	2.72	right mid - 13
50	ATDC5	uninduced & ss	0	2.8	mid - 13
51	ATDC5	uninduced & ss	0	3	above no. 50 -13
52	ATDC5	uninduced & ss	0	2.92	left mid - 13
53	ATDC5	uninduced & ss	0	3.2	top right - 14
54	ATDC5	uninduced & ss	0	2.7	bottom right - 14
55	ATDC5	uninduced & ss	0	2.65	mid top leftish - 14
56	ATDC5	uninduced & ss	0	2.68	bottom mid - 15
57	ATDC5	uninduced & ss	0	2.64	mid - 15
58	ATDC5	uninduced & ss	0	2.33	top left mid - 15
59	ATDC5	uninduced & ss	0	2.79	mid leftish - 16
60	ATDC5	uninduced & ss	0	3.27	mid right - 16
61	ATDC5	uninduced & ss	0	2.85	bottom mid - 16
62	ATDC5	uninduced & ss	0	2.67	mid - 17
63	ATDC5	uninduced & ss	0	3	mid right - 17
64	ATDC5	uninduced & ss	0	3.26	mid leftish top - 17
65	ATDC5	uninduced & ss	0	2.48	mid right top - 17
66	ATDC5	uninduced & ss	0	2.52	mid lower -18
67	ATDC5	uninduced & ss	0	2.38	right lower mid - 18
68	ATDC5	uninduced & ss	0	3.18	lower mid - 19
69	ATDC5	uninduced & ss	0	2.8	top left mid - 19
70	ATDC5	uninduced & ss	0	2.76	mid left -19
71	ATDC5	uninduced & ss	0	4	mid - 20
72	ATDC5	uninduced & ss	0	3.5	mid right - 20
73	ATDC5	uninduced & ss	0	2.67	mid - 21
74	ATDC5	uninduced & ss	0	2.8	mid - 22
75	ATDC5	uninduced & ss	0	2.62	mid lower - 22
76	ATDC5	uninduced & ss	0	2.53	mid right - 22
77	ATDC5	uninduced & ss	0	2.94	left mid - 23
78	ATDC5	uninduced & ss	0	2.84	extreme left upper mid - 23
79	ATDC5	uninduced & ss	0	2.66	right mid - 23
80	ATDC5	uninduced & ss	0	2.36	bottom mid - 23
81	ATDC5	uninduced & ss	0	3.13	top right - 24
82	ATDC5	uninduced & ss	0	2.69	bottom right - 24
83	ATDC5	uninduced & ss	0	2.79	mid bottom - 25
84	ATDC5	uninduced & ss	0	2.58	upper mid - 25
85	ATDC5	uninduced & ss	0	2.3	left mid top - 25
86	ATDC5	uninduced & ss	0	2.53	left bottom - image 26	set 3
87	ATDC5	uninduced & ss	0	1.98	mid bottom - image 26
88	ATDC5	uninduced & ss	0	2.23	right mid - image 26
89	ATDC5	uninduced & ss	0	2.23	right lower - image 26
90	ATDC5	uninduced & ss	0	2.65	right top corner - image 26
91	ATDC5	uninduced & ss	0	2.3	mid lower - image 27
92	ATDC5	uninduced & ss	0	2.13	left lower of no. 91 - image 27
93	ATDC5	uninduced & ss	0	2.27	upper left edge - image 27
94	ATDC5	uninduced & ss	0	2.25	right upper corner - image 27
95	ATDC5	uninduced & ss	0	2.36	right lower corner - image 27
96	ATDC5	uninduced & ss	0	2.22	mid - image 28
97	ATDC5	uninduced & ss	0	2.16	mid bottom - image 28
98	ATDC5	uninduced & ss	0	2.32	right lower - image 28
99	ATDC5	uninduced & ss	0	2.58	left lower edge - image 28
100	ATDC5	uninduced & ss	0	2.48	mid - image 29
101	ATDC5	uninduced & ss	0	2.66	left of no. 100 - image 29
102	ATDC5	uninduced & ss	0	2.52	left mid - image 29
103	ATDC5	uninduced & ss	0	2.37	right upper - image 29
104	ATDC5	uninduced & ss	0	3.34	mid bottom trio - image 29
105	ATDC5	uninduced & ss	0	3.24	mid bottom trio - image 29
106	ATDC5	uninduced & ss	0	3.05	mid bottom trio - image 29
107	ATDC5	uninduced & ss	0	2.91	top left corner - image 30
108	ATDC5	uninduced & ss	0	2.23	mid upper - image 30
109	ATDC5	uninduced & ss	0	2.35	rightish mid - image 30
110	ATDC5	uninduced & ss	0	2.38	right mid edge - image 30
111	ATDC5	uninduced & ss	0	2.67	mid - image 31
112	ATDC5	uninduced & ss	0	2.21	above no. 111 - image 31
113	ATDC5	uninduced & ss	0	2.13	mid bottom - image 31
114	ATDC5	uninduced & ss	0	2.46	left lower corner - image 31
115	ATDC5	uninduced & ss	0	1.96	right mid edge - image 31
116	ATDC5	uninduced & ss	0	2.1	top left corner - image 31
117	ATDC5	uninduced & ss	0	3.1	mid - image 32
118	ATDC5	uninduced & ss	0	2.31	leftish mid - image 32
119	ATDC5	uninduced & ss	0	2.27	left lower mid - image 32
120	ATDC5	uninduced & ss	0	2.25	top right - image 32
121	ATDC5	uninduced & ss	0	3.06	mid pair - image 33
122	ATDC5	uninduced & ss	0	2.49	mid pair - image 33
123	ATDC5	uninduced & ss	0	2.14	left bottom edge - image 33
124	ATDC5	uninduced & ss	0	2.6	right mid - image 33
125	ATDC5	uninduced & ss	0	2.56	right lower corner - image 33
126	ATDC5	uninduced & ss	0	2.52	mid bottom edge - image 34
127	ATDC5	uninduced & ss	0	2.59	top right edge - image 34
128	ATDC5	uninduced & ss	0	2.36	left mid edge - image 34
129	ATDC5	uninduced & ss	0	2	left lower edge - image 34
130	ATDC5	uninduced & ss	0	2	mid - image 35
131	ATDC5	uninduced & ss	0	2.3	left upper - image 35
132	ATDC5	uninduced & ss	0	2.45	left upper corner - image 35
133	ATDC5	uninduced & ss	0	2.23	left top edge - image 35
134	ATDC5	uninduced & ss	0	2.97	left mid - image 35
135	ATDC5	uninduced & ss	0	3.39	left lower corner - image 35
136	ATDC5	uninduced & ss	0	2.92	upper right mid - image 35
137	ATDC5	uninduced & ss	0	2.77	right of no. 137 - image 35
138	ATDC5	uninduced & ss	0	2.42	lower right - image 35

## Sheet: ATDC5 day 7
Sl no.	Sl. No.	Cell line	Treatment type	Day	Cilia length	Comments
1	1	ATDC5	uninduced & ss	7	2.51	middle cell - image 1	set 1	pixel: 0.07206 um
2	2	ATDC5	uninduced & ss	7	1.8	bottom cell - image 1		1 um: 13.877 pixels
3	3	ATDC5	uninduced & ss	7	1.98	top cell - image 1
4	4	ATDC5	uninduced & ss	7	2.308	image 2		ss: serum starved
5	5	ATDC5	uninduced & ss	7	2.65	middle cell - image 3
6	6	ATDC5	uninduced & ss	7	2.45	right bottom - image 3
7	7	ATDC5	uninduced & ss	7	2.45	top cell - image 3
8	8	ATDC5	uninduced & ss	7	2.49	middle cell - image 4
9	9	ATDC5	uninduced & ss	7	2.15	top cell - image 4
10	10	ATDC5	uninduced & ss	7	2.15	image 6
11	11	ATDC5	uninduced & ss	7	2.25	image 7
12	12	ATDC5	uninduced & ss	7	2.44	image 8 - mid
13	13	ATDC5	uninduced & ss	7	2.1	image 8 - below mid (immidiate)
14	14	ATDC5	uninduced & ss	7	2.21	image 8 - below 13
15	15	ATDC5	uninduced & ss	7	2.02	image 8 - right
16	16	ATDC5	uninduced & ss	7	2.36	image 9 - mid
17	17	ATDC5	uninduced & ss	7	1.97	image 9 -above mid
18	18	ATDC5	uninduced & ss	7	2.21	image 9- right to mid
19	19	ATDC5	uninduced & ss	7	2.44	image 9
20	20	ATDC5	uninduced & ss	7	2.28	image 10 - mid
21	21	ATDC5	uninduced & ss	7	3.19	image 10 - left corner bottom
22	22	ATDC5	uninduced & ss	7	2.52	image 10 -left mid
	23	ATDC5	uninduced & ss	7	1.53	image 10 - left corner top
	24	ATDC5	uninduced & ss	7	2.39	image 10 - right to 17
	25	ATDC5	uninduced & ss	7	2.11	image 10 - right corner top
	26	ATDC5	uninduced & ss	7	3.18	image 13 - long one mid	set 2
	27	ATDC5	uninduced & ss	7	2.45	image 13 - left to 26
1	28	ATDC5	uninduced & ss	7	2.68	image 14 - mid
2	29	ATDC5	uninduced & ss	7	2.59	image 14 - above mid (top)
3	30	ATDC5	uninduced & ss	7	2.34	image 14 - left corner top
4	31	ATDC5	uninduced & ss	7	3.12	image 15 - mid
5	32	ATDC5	uninduced & ss	7	2.65	image 15 - below mid (right)
6	33	ATDC5	uninduced & ss	7	2.28	image 15 - left to mid
7	34	ATDC5	uninduced & ss	7	2.74	image 16 - mid (curved)
8	35	ATDC5	uninduced & ss	7	2.45	image 16 - top left
9	36	ATDC5	uninduced & ss	7	2.76	image 16 - top right
10	37	ATDC5	uninduced & ss	7	2.63	image 17 - mid (towards right)
11	38	ATDC5	uninduced & ss	7	2.55	image 17 - immidiate left to mid
12	39	ATDC5	uninduced & ss	7	2.83	image 17 - left (mid)
13	40	ATDC5	uninduced & ss	7	1.56	image 17 - below 39
14	41	ATDC5	uninduced & ss	7	2.1	image 17 - right to mid
15	42	ATDC5	uninduced & ss	7	2.88	image 17 - above mid
16	43	ATDC5	uninduced & ss	7	2.3	image 17 - left to mid (little above)
17	44	ATDC5	uninduced & ss	7	2.68	image 18 - mid
18	45	ATDC5	uninduced & ss	7	2.41	image 18 - right corner bottom
19	46	ATDC5	uninduced & ss	7	2.12	image 18 - left to mid
20	47	ATDC5	uninduced & ss	7	3.14	image 18 - above 46
21	48	ATDC5	uninduced & ss	7	1.92	image 19 - top mid
22	49	ATDC5	uninduced & ss	7	2.48	image 20 - right mid
23	50	ATDC5	uninduced & ss	7	2.34	image 20 - left mid
24	51	ATDC5	uninduced & ss	7	2.33	right of 29 - 14
	52	ATDC5	uninduced & ss	7	2.35	below 30 right - 14
	53	ATDC5	uninduced & ss	7	2.47	bottom mid - 14
	54	ATDC5	uninduced & ss	7	2.5	left bottom -14
	55	ATDC5	uninduced & ss	7	2.52	right of 43 - 17
	56	ATDC5	uninduced & ss	7	2.14	right lower mid - 17
	57	ATDC5	uninduced & ss	7	2.12	below 56 - 17
	58	ATDC5	uninduced & ss	7	2.64	extreme left mid - 18
	59	ATDC5	uninduced & ss	7	2.52	bottom right -20
	60	ATDC5	uninduced & ss	7	2.39	right of 59
	61	ATDC5	uninduced & ss	7	2.67	left mid - 21
	62	ATDC5	uninduced & ss	7	2.57	mid - 21
	63	ATDC5	uninduced & ss	7	2.77	bottom right - 21
	64	ATDC5	uninduced & ss	7	2.58	upper left mid - 22
	65	ATDC5	uninduced & ss	7	2.59	above 64 - 22
	66	ATDC5	uninduced & ss	7	2.84	left bottom - 22
	67	ATDC5	uninduced & ss	7	2.48	right mid - 22
	68	ATDC5	uninduced & ss	7	3	right mid - 23
	69	ATDC5	uninduced & ss	7	2.38	right bottom - 23
	70	ATDC5	uninduced & ss	7	2.72	left lower mid - 23
	71	ATDC5	uninduced & ss	7	2.48	above 70 - 23
	72	ATDC5	uninduced & ss	7	2.78	lower mid - 24
	73	ATDC5	uninduced & ss	7	2.62	bottom left - 24
	74	ATDC5	uninduced & ss	7	2.55	above 73 - 24
	75	ATDC5	uninduced & ss	7	2.71	upper mid left - 24
	76	ATDC5	uninduced & ss	7	2.84	mid left - 24
	77	ATDC5	uninduced & ss	7	2.2	left bottom (middle) -24
	78	ATDC5	uninduced & ss	7	2.56	left of 77 - 24
	79	ATDC5	uninduced & ss	7	2.7	bottom right - 25
	80	ATDC5	uninduced & ss	7	2.38	bottom mid left - 25
	81	ATDC5	uninduced & ss	7	2.2	right of 80 - 25
	82	ATDC5	uninduced & ss	7	2.65	top mid - 25
	83	ATDC5	uninduced & ss	7	2.57	mid - 26
	84	ATDC5	uninduced & ss	7	2.69	bottom mid (lower) - 26
	85	ATDC5	uninduced & ss	7	2.57	right bottom - 27
	86	ATDC5	uninduced & ss	7	2.58	left bottom - 27
	87	ATDC5	uninduced & ss	7	2.83	left mid - 27
	88	ATDC5	uninduced & ss	7	3.04	mid leftish - image 28	set 3
	89	ATDC5	uninduced & ss	7	2.76	right of no. 88 - image 28
	90	ATDC5	uninduced & ss	7	2.43	top left corner - image 28
	91	ATDC5	uninduced & ss	7	2.79	leftish lower mid pair - image 28
	92	ATDC5	uninduced & ss	7	2.65	leftish lower mid pair - image 28
	93	ATDC5	uninduced & ss	7	2.42	right lower edge - image 28
	94	ATDC5	uninduced & ss	7	2.98	left mid edge - image 29
	95	ATDC5	uninduced & ss	7	2.65	left lower - image 29
	96	ATDC5	uninduced & ss	7	2.8	top mid - image 29
	97	ATDC5	uninduced & ss	7	2.33	right mid - image 29
	98	ATDC5	uninduced & ss	7	3.03	right lower edge - image 29
	99	ATDC5	uninduced & ss	7	2.69	mid - image 30
	100	ATDC5	uninduced & ss	7	3.1	left mid edge - image 31
	101	ATDC5	uninduced & ss	7	2.69	top mid - image 31
	102	ATDC5	uninduced & ss	7	2.75	rightish lower mid - image 31
	103	ATDC5	uninduced & ss	7	2.3	left mid - image 32
	104	ATDC5	uninduced & ss	7	2.7	top left corner - image 32
	105	ATDC5	uninduced & ss	7	2.63	left mid edge - image 32
	106	ATDC5	uninduced & ss	7	3.17	right lower mid - image 32
	107	ATDC5	uninduced & ss	7	2.49	right lower edge pair - image 32
	108	ATDC5	uninduced & ss	7	2.22	right lower edge pair - image 32
	109	ATDC5	uninduced & ss	7	2.76	left mid - image 33
	110	ATDC5	uninduced & ss	7	3.5	rightish mid bottom edge - image 33
	111	ATDC5	uninduced & ss	7	2.17	rightish upper - image 33
	112	ATDC5	uninduced & ss	7	3.29	mid lower - image 34
	113	ATDC5	uninduced & ss	7	2.06	right mid edge - image 34
	114	ATDC5	uninduced & ss	7	2.86	mid - image 35
	115	ATDC5	uninduced & ss	7	3.01	mid upper - image 35
	116	ATDC5	uninduced & ss	7	2.47	right lower - image 35
	117	ATDC5	uninduced & ss	7	2.55	right bottom corner - image 35
	118	ATDC5	uninduced & ss	7	2.97	left bottom corner - image 36
	119	ATDC5	uninduced & ss	7	2.57	right upper edge - image 36
	120	ATDC5	uninduced & ss	7	2.8	below no. 119 - image 36
	121	ATDC5	uninduced & ss	7	2.91	mid - image 37
	122	ATDC5	uninduced & ss	7	2.75	left upperish mid - image 37
	123	ATDC5	uninduced & ss	7	3.03	left lower corner - image 37
	124	ATDC5	uninduced & ss	7	2.6	right bottom corner - image 38
	125	ATDC5	uninduced & ss	7	2.5	left bottom corner - image 38
	126	ATDC5	uninduced & ss	7	3.73	left lower edge - image 38
25	Sl no.	Cell line	Treatment type	Day	Cilia length	Comments
26	1	ATDC5	CH & ss	7	2.65	image 1 - mid	set 2
27	2	ATDC5	CH & ss	7	2.34	image 1 - right top
28	3	ATDC5	CH & ss	7	2.69	image 1 - left mid
29	4	ATDC5	CH & ss	7	2.97	image 1 - left of 3
30	5	ATDC5	CH & ss	7	2.92	image 2 - mid
31	6	ATDC5	CH & ss	7	2.79	image 2 - left of mid
32	7	ATDC5	CH & ss	7	2.69	image 2 - right of mid
33	8	ATDC5	CH & ss	7	3.48	image 2 - bottom
34	9	ATDC5	CH & ss	7	2.64	image 3 - mid
35	10	ATDC5	CH & ss	7	3.1	image 3 - left
36	11	ATDC5	CH & ss	7	4.1	image 3 - bottom
37	12	ATDC5	CH & ss	7	3.1	image 3 - right to 11
38	13	ATDC5	CH & ss	7	3.34	image 3 - left to mid
39	14	ATDC5	CH & ss	7	3.21	image 3 - left to 13
40	15	ATDC5	CH & ss	7	2.79	image 3 - left to 14
41	16	ATDC5	CH & ss	7	2.94	image 3 - below 14
42	17	ATDC5	CH & ss	7	3.45	image 4 - mid
43	18	ATDC5	CH & ss	7	2.82	image 4 - right mid
44	19	ATDC5	CH & ss	7	3.41	image 4 - right bottom corner
45	20	ATDC5	CH & ss	7	2.21	image 4 - above 18
46	21	ATDC5	CH & ss	7	2.98	image 4 - above mid
47	22	ATDC5	CH & ss	7	2.21	image 4 - right to 21
48	23	ATDC5	CH & ss	7	2.17	image 4 -left to 21
49	24	ATDC5	CH & ss	7	3.01	image 4 - bottom near middle
50	25	ATDC5	CH & ss	7	2.73	image 4 - left to 24
	26	ATDC5	CH & ss	7	2.92	image 5 - mid
	27	ATDC5	CH & ss	7	3.36	image 5 - below mid (26)
	28	ATDC5	CH & ss	7	2.81	image 5 - left to mid
	29	ATDC5	CH & ss	7	2.91	image 5 - below 28
	30	ATDC5	CH & ss	7	3.13	image 5 - above 28
	31	ATDC5	CH & ss	7	4.12	image 6 - mid
	32	ATDC5	CH & ss	7	1.42	image 6 - immidiate left to mid
	33	ATDC5	CH & ss	7	2.53	image 6 - left to 32
	34	ATDC5	CH & ss	7	4.21	image 6 - bottom left corner
	35	ATDC5	CH & ss	7	2.7	image 6 - above mid
	36	ATDC5	CH & ss	7	3	image 6 - right to 35
	37	ATDC5	CH & ss	7	3.37	image 6 - bottom right (not right corner one)
	38	ATDC5	CH & ss	7	2.8	image 7 - mid
	39	ATDC5	CH & ss	7	2.59	image 7 - left to mid
	40	ATDC5	CH & ss	7	3.77	image 7 - left bottom corner
	41	ATDC5	CH & ss	7	3.13	image 8 - right corner up
	42	ATDC5	CH & ss	7	2.5	image 8 - below 41
	43	ATDC5	CH & ss	7	2.95	image 8 - right mid
	44	ATDC5	CH & ss	7	3.4	image 8 - left mid
	45	ATDC5	CH & ss	7	3.1	image 8 - left to 44
	46	ATDC5	CH & ss	7	2.93	image 8 - left bottom corner
	47	ATDC5	CH & ss	7	2.79	image 9 - mid
	48	ATDC5	CH & ss	7	3.11	image 9 - right to mid (upper)
	49	ATDC5	CH & ss	7	2.84	image 9 - right to mid (lower)
	50	ATDC5	CH & ss	7	2.94	image 9 - above mid
	51	ATDC5	CH & ss	7	3.01	image 10 - left corner
	52	ATDC5	CH & ss	7	2.9	lower mid right - 10
	53	ATDC5	CH & ss	7	3	right bottom corner - 10
	54	ATDC5	CH & ss	7	3.29	lower mid right - 11
	55	ATDC5	CH & ss	7	2.81	upper mid right - 11
	56	ATDC5	CH & ss	7	3.97	mid right - 12
	57	ATDC5	CH & ss	7	2.84	above 56 - 12
	58	ATDC5	CH & ss	7	3.38	below 56 - 12
	59	ATDC5	CH & ss	7	3.05	top right -12
	60	ATDC5	CH & ss	7	3.17	mid - 13
	61	ATDC5	CH & ss	7	3.81	bottom right - 13
	62	ATDC5	CH & ss	7	3.72	top right mid - 13
	63	ATDC5	CH & ss	7	2.85	right of 62 - 13
	64	ATDC5	CH & ss	7	3.48	top right -13
	65	ATDC5	CH & ss	7	3.88	left mid - image 14	set 3
	66	ATDC5	CH & ss	7	2.7	right lower pair - image 14
	67	ATDC5	CH & ss	7	2.94	right lower pair - image 14
	68	ATDC5	CH & ss	7	2.69	mid lower - image 15
	69	ATDC5	CH & ss	7	3.38	below no. 68 - image 15
	70	ATDC5	CH & ss	7	2.73	left mid - image 15
	71	ATDC5	CH & ss	7	2.82	right mid - image 15
	72	ATDC5	CH & ss	7	2.95	right of no. 71 - image 15
	73	ATDC5	CH & ss	7	2.74	right of no. 72 - image 15
	74	ATDC5	CH & ss	7	2.92	top left corner - image 16
	75	ATDC5	CH & ss	7	2.46	top right edge - image 16
	76	ATDC5	CH & ss	7	2.47	right mid - image 16
	77	ATDC5	CH & ss	7	2.88	mid - image 17
	78	ATDC5	CH & ss	7	2.9	left mid - image 17
	79	ATDC5	CH & ss	7	3.2	left mid edge - image 17
	80	ATDC5	CH & ss	7	3.48	left lower edge - image 17
	81	ATDC5	CH & ss	7	2.6	top left edge - image 17
	82	ATDC5	CH & ss	7	2.59	right mid - image 17
	83	ATDC5	CH & ss	7	2.83	right mid edge - image 17
	84	ATDC5	CH & ss	7	2.83	left mid - image 18
	85	ATDC5	CH & ss	7	2.68	below no. 84 - image 18
	86	ATDC5	CH & ss	7	2.92	right of no. 85 - image 18
	87	ATDC5	CH & ss	7	2.93	right upper edge - image 18
	88	ATDC5	CH & ss	7	2.7	right upper mid edge - image 18
	89	ATDC5	CH & ss	7	2.9	top mid - image 19
	90	ATDC5	CH & ss	7	2.73	below no. 89 - image 19
	91	ATDC5	CH & ss	7	2.94	rightish mid - image 19
	92	ATDC5	CH & ss	7	2.45	left upper mid trio - image 19
	93	ATDC5	CH & ss	7	2.32	left upper mid trio - image 19
	94	ATDC5	CH & ss	7	3	top left edge - image 20
	95	ATDC5	CH & ss	7	2.95	rightsh mid lower - image 20
	96	ATDC5	CH & ss	7	3.1	mid lower - image 21
	97	ATDC5	CH & ss	7	2.7	below no. 96 - image 21
	98	ATDC5	CH & ss	7	2.9	mid bottom edge - image 21
	99	ATDC5	CH & ss	7	3.45	right of no. 98 - image 21
	100	ATDC5	CH & ss	7	3	right lower mid - image 21
	101	ATDC5	CH & ss	7	4.24	right of no. 100 - image 21
	102	ATDC5	CH & ss	7	3.67	right top mid - image 21
	103	ATDC5	CH & ss	7	2.72	right mid edge - image 21
	104	ATDC5	CH & ss	7	2.96	mid - image 22
	105	ATDC5	CH & ss	7	3.33	left mid - image 22
	106	ATDC5	CH & ss	7	3.39	left mid top - image 22
	107	ATDC5	CH & ss	7	3.15	left lower edge - image 22
	108	ATDC5	CH & ss	7	2.77	right mid - image 22
	109	ATDC5	CH & ss	7	4.16	right lower edge - image 22
	110	ATDC5	CH & ss	7	3.56	right mid edge - image 22
	111	ATDC5	CH & ss	7	2.79	right upper edge - image 22
	112	ATDC5	CH & ss	7	3	mid - image 23
	113	ATDC5	CH & ss	7	2.42	left lower mid - image 23
	114	ATDC5	CH & ss	7	3.05	right mid edge - image 23
	115	ATDC5	CH & ss	7	3.33	right lower - image 24
	116	ATDC5	CH & ss	7	3.09	left bottom edge - image 24
	117	ATDC5	CH & ss	7	3.29	left top - image 24
	118	ATDC5	CH & ss	7	3.59	below no. 117 - image 24
	119	ATDC5	CH & ss	7	2.56	right upper pair - image 24
	120	ATDC5	CH & ss	7	2.47	right upper pair - image 24

## Sheet: ATDC5 day 14
Sl no.	Cell line	Treatment type	Day	Cilia length	Comments
1	ATDC5	uninduced & ss	14	2.27	image 1	set 1	pixel: 0.07206 um
2	ATDC5	uninduced & ss	14	1.98	middle cell-image 2		1 um: 13.877 pixels
3	ATDC5	uninduced & ss	14	1.88	left cell - image 2
4	ATDC5	uninduced & ss	14	2.26	middle cell - image 3		ss: serum starved
5	ATDC5	uninduced & ss	14	2.67	top right - image 3
6	ATDC5	uninduced & ss	14	1.77	top left - image 3
7	ATDC5	uninduced & ss	14	2.56	middle - image 4
8	ATDC5	uninduced & ss	14	2.17	top - image 4
9	ATDC5	uninduced & ss	14	2.71	middle - image 5
10	ATDC5	uninduced & ss	14	2.25	left middle - image 5
11	ATDC5	uninduced & ss	14	2.51	bottom middle - image 5
12	ATDC5	uninduced & ss	14	2.15	bottom right - image 5
13	ATDC5	uninduced & ss	14	2.6	bottom middle - image 6
14	ATDC5	uninduced & ss	14	2.09	bottom right - image 6
15	ATDC5	uninduced & ss	14	2.59	middle - image 6
16	ATDC5	uninduced & ss	14	2.76	middle - image 7
17	ATDC5	uninduced & ss	14	2.53	top cilia - image 8
18	ATDC5	uninduced & ss	14	2.74	bottom cilia - image 8
19	ATDC5	uninduced & ss	14	1.85	cilia 1 - image 9
20	ATDC5	uninduced & ss	14	2.05	cilia 2 - image 9
21	ATDC5	uninduced & ss	14	2.02	bottom - image 10
22	ATDC5	uninduced & ss	14	2.09	middle - image 10
23	ATDC5	uninduced & ss	14	2.94	middle - image 11
24	ATDC5	uninduced & ss	14	2.81	below 23 - image 11	set 2
25	ATDC5	uninduced & ss	14	3.46	left of 23 - 11
26	ATDC5	uninduced & ss	14	3.5	top left - 11
25	ATDC5	uninduced & ss	14	2.15	above 23 (s shape) - image 11
27	ATDC5	uninduced & ss	14	3.4	above s shape - image 11
28	ATDC5	uninduced & ss	14	3.04	left to s shape - image 11
29	ATDC5	uninduced & ss	14	3.34	left 27 - image 11
30	ATDC5	uninduced & ss	14	3.22	left to 23 - image 11
31	ATDC5	uninduced & ss	14	3.38	left to 30 - image 11
32	ATDC5	uninduced & ss	14	4	Right to 25 - image 11
33	ATDC5	uninduced & ss	14	3.62	mid right (below 32) - image 11
34	ATDC5	uninduced & ss	14	2.6	mid bottom - image 11
35	ATDC5	uninduced & ss	14	3.47	left to 34 - image 11
36	ATDC5	uninduced & ss	14	3.44	middle top - image 12
37	ATDC5	uninduced & ss	14	2.61	left to 36 - image 12
38	ATDC5	uninduced & ss	14	2.7	right bottom - image 12
39	ATDC5	uninduced & ss	14	2.67	left to 38 - image 12
40	ATDC5	uninduced & ss	14	2.95	right to 38 ( below) - image 12
41	ATDC5	uninduced & ss	14	5.16	middle towards right - image 13
42	ATDC5	uninduced & ss	14	4.59	left to 41 - image 13
43	ATDC5	uninduced & ss	14	4.76	above 42 - image 13
44	ATDC5	uninduced & ss	14	4.12	top middle (towards left) - image 13
45	ATDC5	uninduced & ss	14	4.82	right to 44 - image 13
46	ATDC5	uninduced & ss	14	4.45	right to 45 - image 13
47	ATDC5	uninduced & ss	14	5.19	below 45 - image 13
48	ATDC5	uninduced & ss	14	4.79	below 47 - image 13
49	ATDC5	uninduced & ss	14	4	right to 48 - image 13
50	ATDC5	uninduced & ss	14	4.25	left corner - image 13
51	ATDC5	uninduced & ss	14	3.59	right upper corner - 14
52	ATDC5	uninduced & ss	14	3	above 51 - 14
53	ATDC5	uninduced & ss	14	3.47	right mid - 15
54	ATDC5	uninduced & ss	14	3.13	left mid - 15 (upper)
55	ATDC5	uninduced & ss	14	3	left of 54 -15
56	ATDC5	uninduced & ss	14	2.96	top middle - 15
57	ATDC5	uninduced & ss	14	3	below 51 - 15
58	ATDC5	uninduced & ss	14	2.78	right bottom - 15 (right)
59	ATDC5	uninduced & ss	14	2.68	left of 58 - 15
60	ATDC5	uninduced & ss	14	3.35	upper mid - 17
61	ATDC5	uninduced & ss	14	2.99	left mid - 17
62	ATDC5	uninduced & ss	14	3.35	bottom left - 17
63	ATDC5	uninduced & ss	14	3.88	mid - 18
64	ATDC5	uninduced & ss	14	3.02	right bottom - 18
65	ATDC5	uninduced & ss	14	3.34	extreme left mid - 18
66	ATDC5	uninduced & ss	14	3.66	right of 65 - 18
67	ATDC5	uninduced & ss	14	3.5	above 66 - 18
68	ATDC5	uninduced & ss	14	3.23	upper mid -19
69	ATDC5	uninduced & ss	14	3.41	mid (below 68) -19
70	ATDC5	uninduced & ss	14	3.56	left of 69 - 19
71	ATDC5	uninduced & ss	14	3.39	right of 68 - 19
72	ATDC5	uninduced & ss	14	3.56	mid - 20
73	ATDC5	uninduced & ss	14	3.49	above 72 (right) - 20
74	ATDC5	uninduced & ss	14	2.94	above 73 - 20
75	ATDC5	uninduced & ss	14	2.97	mid rightish - image 21	set 3
76	ATDC5	uninduced & ss	14	2.93	mid left edge - image 21
77	ATDC5	uninduced & ss	14	3.2	top left edge - image 21
78	ATDC5	uninduced & ss	14	2.57	right top edge - image 21
79	ATDC5	uninduced & ss	14	3.33	right lower edge - image 21
80	ATDC5	uninduced & ss	14	2.7	mid upper - image 22
81	ATDC5	uninduced & ss	14	3.15	top mid edge pair - image 22
82	ATDC5	uninduced & ss	14	3.06	top mid edge pair - image 22
83	ATDC5	uninduced & ss	14	2.35	mid bottom - image 22
84	ATDC5	uninduced & ss	14	2.6	above no. 83 - image 22
85	ATDC5	uninduced & ss	14	2.76	upper right mid edge - image 22
86	ATDC5	uninduced & ss	14	3.12	mid - image 23
87	ATDC5	uninduced & ss	14	3	left mid - image 23
88	ATDC5	uninduced & ss	14	2.75	top left - image 23
89	ATDC5	uninduced & ss	14	3.13	lower mid - image 23
90	ATDC5	uninduced & ss	14	2.44	mid lower - image 24
91	ATDC5	uninduced & ss	14	2.95	left mid - image 24
92	ATDC5	uninduced & ss	14	2.59	top leftish - image 24
93	ATDC5	uninduced & ss	14	2.59	mid rightish upper - image 24
94	ATDC5	uninduced & ss	14	2.57	mid - image 24
95	ATDC5	uninduced & ss	14	3.37	mid lower - image 25
96	ATDC5	uninduced & ss	14	2.69	bottom leftish edge - image 25
97	ATDC5	uninduced & ss	14	2.72	mid left - image 25
98	ATDC5	uninduced & ss	14	2.48	left lower of no. 97 - image 25
99	ATDC5	uninduced & ss	14	2.67	upper left mid - image 25
100	ATDC5	uninduced & ss	14	3.36	mid rightish - image 25
101	ATDC5	uninduced & ss	14	3.38	mid - image 26
102	ATDC5	uninduced & ss	14	3.14	below no. 101 - image 26
103	ATDC5	uninduced & ss	14	3.45	mid left bottom - image 26
104	ATDC5	uninduced & ss	14	2.93	top leftish mid - image 26
105	ATDC5	uninduced & ss	14	2.91	top left corner - image 26
106	ATDC5	uninduced & ss	14	3.68	left mid - image 26
107	ATDC5	uninduced & ss	14	3.06	left lower corner - image 26
108	ATDC5	uninduced & ss	14	2.22	below no. 108 - image 26
109	ATDC5	uninduced & ss	14	4	mid right - image 26
110	ATDC5	uninduced & ss	14	3.98	right bottom mid - image 26
111	ATDC5	uninduced & ss	14	2.8	upper mid - image 26
112	ATDC5	uninduced & ss	14	3.13	right of no. 111 - image 26
113	ATDC5	uninduced & ss	14	3.36	below no. 112 - image 26
114	ATDC5	uninduced & ss	14	3.23	right bottom corner - image 26
115	ATDC5	uninduced & ss	14	3.4	mid (leftish) - image 27
116	ATDC5	uninduced & ss	14	3.21	left mid - image 27
117	ATDC5	uninduced & ss	14	3.42	left mdi edge - image 27
118	ATDC5	uninduced & ss	14	3.11	below no. 116 - image 27
119	ATDC5	uninduced & ss	14	3.4	lower mid right - image 27
120	ATDC5	uninduced & ss	14	3.57	mid bottom right - image 27
121	ATDC5	uninduced & ss	14	3.23	mid right - image 28
122	ATDC5	uninduced & ss	14	2.51	leftish mid - image 28
123	ATDC5	uninduced & ss	14	2.36	left above no. 122 - image 28
124	ATDC5	uninduced & ss	14	2.42	left mid edge - image 28
125	ATDC5	uninduced & ss	14	3.38	mid lower - image 28
126	ATDC5	uninduced & ss	14	2.82	upper mid right - image 28
127	ATDC5	uninduced & ss	14	2.65	right mid bottom - image 28
128	ATDC5	uninduced & ss	14	2.94	mid - image 29
129	ATDC5	uninduced & ss	14	3.16	top left edge - image 29
130	ATDC5	uninduced & ss	14	2.97	bottom left corner - image 29
131	ATDC5	uninduced & ss	14	2.84	mid right - image 29
132	ATDC5	uninduced & ss	14	3	right of no. 131 - image 29
133	ATDC5	uninduced & ss	14	3	right bottom edge - image 29
134	ATDC5	uninduced & ss	14	2.67	mid pair (upper) - image 30
135	ATDC5	uninduced & ss	14	2.78	upper mid left - image 30
136	ATDC5	uninduced & ss	14	3.15	mid - image 31
137	ATDC5	uninduced & ss	14	3.34	left lower mid - image 31
138	ATDC5	uninduced & ss	14	3.28	upper left edge - image 31
139	ATDC5	uninduced & ss	14	3.67	mid right - image 32
140	ATDC5	uninduced & ss	14	3.3	right lower edge - image 32
141	ATDC5	uninduced & ss	14	2.71	lower mid leftish - image 32
142	ATDC5	uninduced & ss	14	2.72	upper mid left - image 32
143	ATDC5	uninduced & ss	14	3.66	mid - image 33
144	ATDC5	uninduced & ss	14	3.2	below no. 143 - image 33
145	ATDC5	uninduced & ss	14	3.07	left lower mid - image 33
146	ATDC5	uninduced & ss	14	3.23	left lower - image 33
147	ATDC5	uninduced & ss	14	3.21	left bottom edge - image 33
148	ATDC5	uninduced & ss	14	3.15	top mid edge - image 33
149	ATDC5	uninduced & ss	14	2.71	upper right pair - image 33
150	ATDC5	uninduced & ss	14	2.62	upper right pair - image 33
151	ATDC5	uninduced & ss	14	2.68	right lower mid - image 33
152	ATDC5	uninduced & ss	14	2.93	below no. 151 - image 33
Sl no.	Cell line	Treatment type	Day	Cilia length	Comments
1	ATDC5	CH & ss	14	2.2	middle - image 1	set 1
2	ATDC5	CH & ss	14	2.62	bottom left - image 1
3	ATDC5	CH & ss	14	2.26	top right - image 1
4	ATDC5	CH & ss	14	2.98	middle - image 2
5	ATDC5	CH & ss	14	2.88	bottom - image 2
6	ATDC5	CH & ss	14	2.1	image 3
7	ATDC5	CH & ss	14	3.48	image 4
8	ATDC5	CH & ss	14	3.4	bottom right - image 5
9	ATDC5	CH & ss	14	2.88	top middle - image 5
10	ATDC5	CH & ss	14	2.83	left - image 5
11	ATDC5	CH & ss	14	2.5	top - image 5
12	ATDC5	CH & ss	14	2.76	image 6
13	ATDC5	CH & ss	14	2.83	middle - image 7
14	ATDC5	CH & ss	14	2.78	left bottom - image 8
15	ATDC5	CH & ss	14	3.11	middle - image 8
16	ATDC5	CH & ss	14	3.21	top left - image 8
17	ATDC5	CH & ss	14	2.89	top middle - image 8
18	ATDC5	CH & ss	14	3.4	middle - image 9
19	ATDC5	CH & ss	14	2.93	left top - image 9
20	ATDC5	CH & ss	14	2.74	middle - image 10
21	ATDC5	CH & ss	14	2.55	left - image 10
22	ATDC5	CH & ss	14	2.9	right - image 10
23	ATDC5	CH & ss	14	4.19	mid top - image 11	set 2
24	ATDC5	CH & ss	14	5.23	left to 23 - image 11
25	ATDC5	CH & ss	14	3.26	mid bottom (upper one) - image 11
26	ATDC5	CH & ss	14	3.86	below 25 - image 11
27	ATDC5	CH & ss	14	3.16	mid top - image 12
28	ATDC5	CH & ss	14	4.16	bottom (towards right) - image 13
29	ATDC5	CH & ss	14	4.18	left to 28 - image 13
30	ATDC5	CH & ss	14	4.23	bottom - image 14
31	ATDC5	CH & ss	14	3.41	left mid - image 14
32	ATDC5	CH & ss	14	5	left top corner (lowest one of 3) - image 14
33	ATDC5	CH & ss	14	4.4	left top corner (top one of 3) - image 14
34	ATDC5	CH & ss	14	6.26	left top corner (middle one of 3) - image 14
35	ATDC5	CH & ss	14	3.49	mid - image 15
36	ATDC5	CH & ss	14	5.22	image 16
37	ATDC5	CH & ss	14	3.95	mid upper one - image 17
38	ATDC5	CH & ss	14	3.78	mid lower one - image 17
39	ATDC5	CH & ss	14	5.47	mid - image 18
40	ATDC5	CH & ss	14	4.11	image 19
41	ATDC5	CH & ss	14	3.38	image 20
42	ATDC5	CH & ss	14	9.14	right bottom corner - image 21
43	ATDC5	CH & ss	14	2.46	mid - image 21
44	ATDC5	CH & ss	14	3.26	Left to mid (upper one) - image 21
45	ATDC5	CH & ss	14	3.52	below 44 - image 21
46	ATDC5	CH & ss	14	3.44	mid - image 22
47	ATDC5	CH & ss	14	3.8	bottom - image 23
48	ATDC5	CH & ss	14	3.84	top - image 23
49	ATDC5	CH & ss	14	7.34	right - image 24
50	ATDC5	CH & ss	14	8.05	left - image 24
51	ATDC5	CH & ss	14	5.47	mid - 24
52	ATDC5	CH & ss	14	3.2	mid - image 1	set 3 (1-30 images)
53	ATDC5	CH & ss	14	3.08	above no. 52 - image 2
54	ATDC5	CH & ss	14	5.1	mid - image 2
55	ATDC5	CH & ss	14	4.1	top left corner - image 2
56	ATDC5	CH & ss	14	3.78	top right corner - image 2
57	ATDC5	CH & ss	14	4.56	mid left - image 3
58	ATDC5	CH & ss	14	3.59	top right corner - image 3
59	ATDC5	CH & ss	14	4.49	mid - image 4
60	ATDC5	CH & ss	14	4.36	below no. 59 - image 4
61	ATDC5	CH & ss	14	3.74	left mid - image 4
62	ATDC5	CH & ss	14	3.98	leftish mid - image 5
63	ATDC5	CH & ss	14	4.34	right mid - image 5
64	ATDC5	CH & ss	14	4.18	left lower - image 5
65	ATDC5	CH & ss	14	3.43	mid - image 6
66	ATDC5	CH & ss	14	3.94	lower mid - image 7
67	ATDC5	CH & ss	14	3.49	mid - image 7
68	ATDC5	CH & ss	14	5.57	mid - image 8
69	ATDC5	CH & ss	14	6.46	right of mid - image 8
70	ATDC5	CH & ss	14	4.44	top left mid edge - image 8
71	ATDC5	CH & ss	14	3.37	mid leftish - image 8
72	ATDC5	CH & ss	14	3.98	mid rightish - image 9
73	ATDC5	CH & ss	14	3.28	mid lower - image 9
74	ATDC5	CH & ss	14	4.56	right mid - image 10
75	ATDC5	CH & ss	14	3.93	mid lower pair - image 10
76	ATDC5	CH & ss	14	3.33	mid lower pair - image 10
77	ATDC5	CH & ss	14	4.99	mid rightish - image 11
78	ATDC5	CH & ss	14	4.22	mid - image 11
79	ATDC5	CH & ss	14	3	leftish upper mid - image 11
80	ATDC5	CH & ss	14	4	lower mid - image 12
81	ATDC5	CH & ss	14	3.72	mid - image 12
82	ATDC5	CH & ss	14	2.7	left lower mid - image 12
83	ATDC5	CH & ss	14	4.57	mid pair - image 13
84	ATDC5	CH & ss	14	3.99	mid pair - image 13
85	ATDC5	CH & ss	14	3.33	mid lower - image 14
86	ATDC5	CH & ss	14	4.12	left upper - image 14
87	ATDC5	CH & ss	14	3.95	right upper edge - image 14
88	ATDC5	CH & ss	14	5.07	mid - image 15
89	ATDC5	CH & ss	14	5.96	mid bottom - image 15
90	ATDC5	CH & ss	14	3.45	mid quad - image 16
91	ATDC5	CH & ss	14	2.92	mid quad - image 16
92	ATDC5	CH & ss	14	3.07	mid quad - image 16
93	ATDC5	CH & ss	14	3.67	mid - image 17
94	ATDC5	CH & ss	14	3.27	right upper mid - image 17
95	ATDC5	CH & ss	14	8.84	mid - image 18
96	ATDC5	CH & ss	14	5.94	mid - image 19
97	ATDC5	CH & ss	14	5.23	lower mid - image 19
98	ATDC5	CH & ss	14	3.96	left upper mid - image 19
99	ATDC5	CH & ss	14	4.67	left lower corner - image 19
100	ATDC5	CH & ss	14	6.73	right of mid - image 19
101	ATDC5	CH & ss	14	5.95	right mid - image 19
102	ATDC5	CH & ss	14	6.5	right mid - image 20
103	ATDC5	CH & ss	14	4.24	left mid - image 20
104	ATDC5	CH & ss	14	4.32	leftish mid - image 21
105	ATDC5	CH & ss	14	4.02	mid - image 21
106	ATDC5	CH & ss	14	3.67	rightish mid - image 21
107	ATDC5	CH & ss	14	4.2	mid - image 22
108	ATDC5	CH & ss	14	4.45	top left edge - image 22
109	ATDC5	CH & ss	14	4.14	left lower edge - image 22
110	ATDC5	CH & ss	14	4.13	right of no. 109 - image 22
111	ATDC5	CH & ss	14	4.43	right top edge - image 22
112	ATDC5	CH & ss	14	3.58	right mid - image 22
113	ATDC5	CH & ss	14	4.46	lower left - image 23
114	ATDC5	CH & ss	14	5.34	right mid - image 24
115	ATDC5	CH & ss	14	6.66	right top pair - image 24
116	ATDC5	CH & ss	14	5.48	right top pair - image 24
117	ATDC5	CH & ss	14	3.27	rightish mid - image 25
118	ATDC5	CH & ss	14	5.02	left top corner - image 26
119	ATDC5	CH & ss	14	3.95	right - image 26
120	ATDC5	CH & ss	14	4.42	left lower edge - image 29
121	ATDC5	CH & ss	14	4.79	right top - image 29
122	ATDC5	CH & ss	14	4.37	rightish mid bottom - image 30
123	ATDC5	CH & ss	14	4.08	leftish mid bottom - image 30
124	ATDC5	CH & ss	14	3.08	mid triple - image 30
125	ATDC5	CH & ss	14	3.14	mid triple - image 30
126	ATDC5	CH & ss	14	2.76	mid triple - image 30

## Sheet: ATDC5 day 21
Sl no.	Cell line	Treatment type	Day	Cilia length	Comments
1	ATDC5	uninduced & ss	21	2.51	bottom - image 1	set 1	pixel: 0.07206 um
2	ATDC5	uninduced & ss	21	2.42	right top - image 1		1 um: 13.877 pixels
3	ATDC5	uninduced & ss	21	2.65	left top - image 1
4	ATDC5	uninduced & ss	21	1.9	top - image 2		ss: serum starved
5	ATDC5	uninduced & ss	21	2.46	bottom - image 2
6	ATDC5	uninduced & ss	21	2.02	image 3
7	ATDC5	uninduced & ss	21	2.2	image 4
8	ATDC5	uninduced & ss	21	2.22	top right - image 5
9	ATDC5	uninduced & ss	21	2.4	middle - image 5
10	ATDC5	uninduced & ss	21	1.97	image 6
11	ATDC5	uninduced & ss	21	1.99	left - image 8
12	ATDC5	uninduced & ss	21	1.63	right - image 8
13	ATDC5	uninduced & ss	21	2.57	bottom - image 9
14	ATDC5	uninduced & ss	21	2.02	middle - image 9
15	ATDC5	uninduced & ss	21	2.21	right - image 9
16	ATDC5	uninduced & ss	21	2.71	image 10
17	ATDC5	uninduced & ss	21	2.14	ulta "S" - image 11	set 2
18	ATDC5	uninduced & ss	21	2.49	mid left - 11
19	ATDC5	uninduced & ss	21	2.14	below 17 - image 11
20	ATDC5	uninduced & ss	21	1.91	right corner bottom - image 12
21	ATDC5	uninduced & ss	21	2.63	left to 20 - image 12
22	ATDC5	uninduced & ss	21	1.83	left corner top (upper) - image 12
23	ATDC5	uninduced & ss	21	2.43	mid - image 13
24	ATDC5	uninduced & ss	21	2.39	above mid (left) - image 13
25	ATDC5	uninduced & ss	21	2.4	below mid (right) - image 13
26	ATDC5	uninduced & ss	21	1.81	left corner - image 13
27	ATDC5	uninduced & ss	21	2.1	mid left - image 14
28	ATDC5	uninduced & ss	21	2.15	mid - image 15
29	ATDC5	uninduced & ss	21	2	right to mid (little below) - image 15
30	ATDC5	uninduced & ss	21	2.27	below 29 - image 15
31	ATDC5	uninduced & ss	21	2.26	below 30 (towards left) - image 15
32	ATDC5	uninduced & ss	21	2.19	right to 31 - image 15
33	ATDC5	uninduced & ss	21	3.2	above 29 - image 15
34	ATDC5	uninduced & ss	21	2	left to mid (little above) - image 15
35	ATDC5	uninduced & ss	21	2.45	below 34 - image 15
36	ATDC5	uninduced & ss	21	3.17	mid - image 16
37	ATDC5	uninduced & ss	21	3.63	bottom left - image 16
38	ATDC5	uninduced & ss	21	3.67	right to mid (little above) - image 16
39	ATDC5	uninduced & ss	21	2.8	below 38 - image 16
40	ATDC5	uninduced & ss	21	1.94	mid - image 17
41	ATDC5	uninduced & ss	21	2.68	above mid - image 17
42	ATDC5	uninduced & ss	21	2.24	right to mid - image 17
43	ATDC5	uninduced & ss	21	2.43	below 42 - image 17
44	ATDC5	uninduced & ss	21	2.23	right to 41 - image 17
45	ATDC5	uninduced & ss	21	2.99	right - image 18
46	ATDC5	uninduced & ss	21	2.89	left - image 18
47	ATDC5	uninduced & ss	21	2.65	mid towards right - image 19
48	ATDC5	uninduced & ss	21	2.56	left to 47- image 19
49	ATDC5	uninduced & ss	21	2.54	right lower - image 19
50	ATDC5	uninduced & ss	21	3.39	bottom mid - image 19
51	ATDC5	uninduced & ss	21	3.37	left mid - image 20
52	ATDC5	uninduced & ss	21	2.02	left corner top (below 22-right) - image 12
53	ATDC5	uninduced & ss	21	1.85	left corner top (below 22-left) - image 12
54	ATDC5	uninduced & ss	21	2.36	right middle (lower right) - 20
55	ATDC5	uninduced & ss	21	2.37	right middle (slightly upper) - 20
56	ATDC5	uninduced & ss	21	2.5	mid top - image 21	set 3
57	ATDC5	uninduced & ss	21	2.1	right upper - image 21
58	ATDC5	uninduced & ss	21	2.72	right lower corner - image 21
59	ATDC5	uninduced & ss	21	2.3	left lower mid - image 21
60	ATDC5	uninduced & ss	21	2.3	left lower corner - image 21
61	ATDC5	uninduced & ss	21	2.1	right of no. 59 - image 21
62	ATDC5	uninduced & ss	21	2.55	mid upper - image 22
63	ATDC5	uninduced & ss	21	2.98	left mid edge - image 22
64	ATDC5	uninduced & ss	21	2.3	left mid - image 22
65	ATDC5	uninduced & ss	21	2.67	rightish mid - image 22
66	ATDC5	uninduced & ss	21	2.61	right mid edge - image 22
67	ATDC5	uninduced & ss	21	2.58	right top mid - image 22
68	ATDC5	uninduced & ss	21	2.72	left mid - image 23
69	ATDC5	uninduced & ss	21	3.04	mid bottom edge - image 23
70	ATDC5	uninduced & ss	21	2.29	mid upper - image 23
71	ATDC5	uninduced & ss	21	2.52	right upper mid - image 23
72	ATDC5	uninduced & ss	21	2.5	rightish mid pair - image 23
73	ATDC5	uninduced & ss	21	2.98	rightish mid pair - image 23
74	ATDC5	uninduced & ss	21	2.79	right mid edge - image 23
75	ATDC5	uninduced & ss	21	3.15	right lower - image 23
76	ATDC5	uninduced & ss	21	2.78	right lower corner - image 23
77	ATDC5	uninduced & ss	21	2.56	left lower - image 24
78	ATDC5	uninduced & ss	21	2.94	mid lower - image 24
79	ATDC5	uninduced & ss	21	2.34	right mid lower - image 24
80	ATDC5	uninduced & ss	21	2.52	right upper mid - image 24
81	ATDC5	uninduced & ss	21	2.35	upper leftish mid - image 24
82	ATDC5	uninduced & ss	21	2.53	mid upper - image 25
83	ATDC5	uninduced & ss	21	2.53	left upper mid - image 25
84	ATDC5	uninduced & ss	21	2.6	left lower corner - image 25
85	ATDC5	uninduced & ss	21	3	mid lower - image 25
86	ATDC5	uninduced & ss	21	2.53	mid pair - image 26
87	ATDC5	uninduced & ss	21	2.37	mid left - image 26
88	ATDC5	uninduced & ss	21	2.47	leftish mid - image 26
89	ATDC5	uninduced & ss	21	3.47	mid bottom - image 26
90	ATDC5	uninduced & ss	21	2.74	left mid - image 27
91	ATDC5	uninduced & ss	21	2.9	below no. 90
92	ATDC5	uninduced & ss	21	3.14	bottom mid - image 27
93	ATDC5	uninduced & ss	21	2.82	right mid edge - image 27
94	ATDC5	uninduced & ss	21	2.27	left of no. 93 - image 27
95	ATDC5	uninduced & ss	21	3.48	left mid - image 28
96	ATDC5	uninduced & ss	21	2.79	left lower trio - image 28
97	ATDC5	uninduced & ss	21	3.3	left lower trio - image 28
98	ATDC5	uninduced & ss	21	2.59	left lower trio - image 28
99	ATDC5	uninduced & ss	21	2.69	below no. 96 - image 28
100	ATDC5	uninduced & ss	21	2.22	right lower mid trio - image 28
101	ATDC5	uninduced & ss	21	2.21	right lower mid trio - image 28
102	ATDC5	uninduced & ss	21	2.75	right lower mid trio - image 28
103	ATDC5	uninduced & ss	21	2.51	right of no. 102 - image 28
104	ATDC5	uninduced & ss	21	2.57	lower mid pair - image 29
105	ATDC5	uninduced & ss	21	2.67	lower mid pair - image 29
106	ATDC5	uninduced & ss	21	2.84	left mid edge - image 30
107	ATDC5	uninduced & ss	21	2.24	left mid - image 30
108	ATDC5	uninduced & ss	21	2.69	top right corner - image 30
109	ATDC5	uninduced & ss	21	2.54	right lower - image 30
110	ATDC5	uninduced & ss	21	4.19	mid lower - image 30
111	ATDC5	uninduced & ss	21	2.62	mid - image 31
112	ATDC5	uninduced & ss	21	2.43	left mid - image 31
113	ATDC5	uninduced & ss	21	2.3	above no. 112 - image 31
114	ATDC5	uninduced & ss	21	3.48	left of no. 113 - image 31
115	ATDC5	uninduced & ss	21	2.62	mid upper - image 32
116	ATDC5	uninduced & ss	21	2.36	below no. 115 - image 32
117	ATDC5	uninduced & ss	21	2.87	right mid - image 32
118	ATDC5	uninduced & ss	21	2.7	top mid edge - image 32
119	ATDC5	uninduced & ss	21	3.33	mid bottom edge - image 32
120	ATDC5	uninduced & ss	21	2.29	lower mid quartet - image 33
121	ATDC5	uninduced & ss	21	2.39	lower mid quartet - image 33
122	ATDC5	uninduced & ss	21	2.43	lower mid quartet - image 33
123	ATDC5	uninduced & ss	21	2.65	right of no. 122 (cross)- image 33
124	ATDC5	uninduced & ss	21	2.57	right of no. 122 (cross)- image 33
125	ATDC5	uninduced & ss	21	2.17	left of no. 123 - image 33
Sl no.	Cell line	Treatment type	Day	Cilia length	Comments
1	ATDC5	CH & ss	21	3.29	image 1	set 1
2	ATDC5	CH & ss	21	3.53	middle - image 2
3	ATDC5	CH & ss	21	3.04	bottom right - image 2
4	ATDC5	CH & ss	21	3.01	middle - image 3
5	ATDC5	CH & ss	21	3.53	left - image 3
6	ATDC5	CH & ss	21	3.46	right - image 3
7	ATDC5	CH & ss	21	3.7	middle - image 4
8	ATDC5	CH & ss	21	2.8	top - image 4
9	ATDC5	CH & ss	21	3.1	middle - image 5
10	ATDC5	CH & ss	21	3.1	right - image 5
11	ATDC5	CH & ss	21	4.34	image 6
12	ATDC5	CH & ss	21	3.33	middle - image 7
13	ATDC5	CH & ss	21	4.1	mid bottom - image 7
14	ATDC5	CH & ss	21	2.43	mid bottom left - image 7
15	ATDC5	CH & ss	21	2.92	top mid - image 7
16	ATDC5	CH & ss	21	3.27	top mid right - image 7
17	ATDC5	CH & ss	21	2.71	right mid - image 7
18	ATDC5	CH & ss	21	2.86	above no. 16 - image 7
19	ATDC5	CH & ss	21	4.17	mid - image 8
20	ATDC5	CH & ss	21	2.87	right bottom - image 8
21	ATDC5	CH & ss	21	2.55	above no. 20 - image 8
22	ATDC5	CH & ss	21	2.38	above no. 21 - image 8
23	ATDC5	CH & ss	21	3.55	mid - image 9
24	ATDC5	CH & ss	21	3.14	right - image 9
25	ATDC5	CH & ss	21	3.1	mid - image 10
26	ATDC5	CH & ss	21	2.92	right mid - image 10
27	ATDC5	CH & ss	21	3.15	top right - image 10
28	ATDC5	CH & ss	21	3.52	bottom - image 10
29	ATDC5	CH & ss	21	4.04	top left - image 10
30	ATDC5	CH & ss	21	2.6	extreme right mid - 10
31	ATDC5	CH & ss	21	3.44	right bottom - image 11	set 2
32	ATDC5	CH & ss	21	3.66	left top - image 11
33	ATDC5	CH & ss	21	3.15	mid (towards right below) - image 12
34	ATDC5	CH & ss	21	2.93	mid (right one of 3) - image 12
35	ATDC5	CH & ss	21	2.65	mid (middle of 3) -image 12
36	ATDC5	CH & ss	21	2.44	mid left of 3 - image 12
37	ATDC5	CH & ss	21	3.23	mid right -image 13
38	ATDC5	CH & ss	21	3.05	left to 37 - image 13
39	ATDC5	CH & ss	21	3.63	left to 38 - image 13
40	ATDC5	CH & ss	21	2.99	left to 39 - image 13
41	ATDC5	CH & ss	21	3.31	bottom (right) - image 13
42	ATDC5	CH & ss	21	2.81	bottom - image 14
43	ATDC5	CH & ss	21	3.21	mid right -image 15
44	ATDC5	CH & ss	21	3.74	above 43 - image 15
45	ATDC5	CH & ss	21	3.7	below 43 - image 15
46	ATDC5	CH & ss	21	3.55	left bottom - image 15
47	ATDC5	CH & ss	21	3.54	top left (mid) - image 16
48	ATDC5	CH & ss	21	3.26	below 47 (mid) - image 16
49	ATDC5	CH & ss	21	2.97	mid - image 17
50	ATDC5	CH & ss	21	2.7	towards bottom - image 17
51	ATDC5	CH & ss	21	2.91	right of 32 (lower mid) - 11
52	ATDC5	CH & ss	21	3.1	bottom (top) - image 13
53	ATDC5	CH & ss	21	2.82	bottom (lower) - image 13
54	ATDC5	CH & ss	21	3.4	above 46 - 15
55	ATDC5	CH & ss	21	3.39	lowest one (mid) - 16
56	ATDC5	CH & ss	21	2.88	right slightly upper mid - 17
57	ATDC5	CH & ss	21	3.36	upper mid - 18
58	ATDC5	CH & ss	21	3.1	right of 57 - 18
59	ATDC5	CH & ss	21	3.31	top most right corner - 18
60	ATDC5	CH & ss	21	3.42	mid left (upper) - 18
61	ATDC5	CH & ss	21	3.85	mid left (lower) - 18
62	ATDC5	CH & ss	21	4.02	lower - 19
63	ATDC5	CH & ss	21	3.21	upper - 19
64	ATDC5	CH & ss	21	3.78	upper right - 20
65	ATDC5	CH & ss	21	2.82	bottom cluster (left) - 20
66	ATDC5	CH & ss	21	2.83	right of 65 - 20
67	ATDC5	CH & ss	21	2.64	below 65 rightish - 20
68	ATDC5	CH & ss	21	3.54	leftish mid - image 21	set 3
69	ATDC5	CH & ss	21	3.75	bottom - image 21
70	ATDC5	CH & ss	21	2.82	left of no. 69 - image 21
71	ATDC5	CH & ss	21	2.77	right lower mid - image 21
72	ATDC5	CH & ss	21	3.79	mid upper - image 22
73	ATDC5	CH & ss	21	3.19	below no. 72 - image 22
74	ATDC5	CH & ss	21	3.33	upper left pair - image 22
75	ATDC5	CH & ss	21	3.66	upper left pair - image 22
76	ATDC5	CH & ss	21	2.92	mid upper - image 23
77	ATDC5	CH & ss	21	2.82	right bottom - image 23
78	ATDC5	CH & ss	21	2.76	right mid - image 23
79	ATDC5	CH & ss	21	2.94	top right corner - image 23
80	ATDC5	CH & ss	21	3.43	left bottom - image 23
81	ATDC5	CH & ss	21	2.99	top right edge - image 25
82	ATDC5	CH & ss	21	3.08	top right edge - image 25
83	ATDC5	CH & ss	21	2.87	mid - image 25
84	ATDC5	CH & ss	21	2.86	mid upper pair - image 26
85	ATDC5	CH & ss	21	2.6	mid upper pair - image 26
86	ATDC5	CH & ss	21	3.35	left mid - image 26
87	ATDC5	CH & ss	21	3.24	upper right - image 26
88	ATDC5	CH & ss	21	2.73	leftish mid - image 26
89	ATDC5	CH & ss	21	4.25	leftish mid - image 27
90	ATDC5	CH & ss	21	5.09	left of no. 89 - image 27
91	ATDC5	CH & ss	21	3.75	left of no. 90 - image 27
92	ATDC5	CH & ss	21	3.12	left lower mid - image 27
93	ATDC5	CH & ss	21	3.14	right of no. 92 - image 27
94	ATDC5	CH & ss	21	2.84	below no. 93 - image 27
95	ATDC5	CH & ss	21	3.23	top rightish pair - image 27
96	ATDC5	CH & ss	21	3.25	top rightish pair - image 27
97	ATDC5	CH & ss	21	3.65	right mid - image 27
98	ATDC5	CH & ss	21	3.54	right of no. 97 - image 27
99	ATDC5	CH & ss	21	3.1	right upper corner - image 27
100	ATDC5	CH & ss	21	3.9	left mid - image 28
101	ATDC5	CH & ss	21	2.96	left of no. 100 - image 28
102	ATDC5	CH & ss	21	4.1	above no. 101 - image 28
103	ATDC5	CH & ss	21	2.99	left top corner edge - image 28
104	ATDC5	CH & ss	21	2.9	left top corner edge - image 28
105	ATDC5	CH & ss	21	3.09	left mid - image 28
106	ATDC5	CH & ss	21	3.06	mid upper - image 28
107	ATDC5	CH & ss	21	4.55	right upper mid - image 28
108	ATDC5	CH & ss	21	3.38	right mid edge - image 28
109	ATDC5	CH & ss	21	3.58	mid bottom - image 29
110	ATDC5	CH & ss	21	3.12	left mid - image 29
111	ATDC5	CH & ss	21	2.99	leftish mid - image 29
112	ATDC5	CH & ss	21	3	left lower - image 29
113	ATDC5	CH & ss	21	3.11	upper left edge - image 29
114	ATDC5	CH & ss	21	4.18	right mid - image 29
115	ATDC5	CH & ss	21	3.09	mid upper - image 30
116	ATDC5	CH & ss	21	3.25	upper left edge - image 30
117	ATDC5	CH & ss	21	3.12	right mid - image 30
118	ATDC5	CH & ss	21	3.43	mid lower - image 30
119	ATDC5	CH & ss	21	2.67	rightish mid - image 30
120	ATDC5	CH & ss	21	3.28	rightish mid - image 31
121	ATDC5	CH & ss	21	2.9	mid - image 31
122	ATDC5	CH & ss	21	3.78	below no. 120 - image 31
123	ATDC5	CH & ss	21	2.78	right lower edge - image 31
124	ATDC5	CH & ss	21	4.23	left mid - image 31
125	ATDC5	CH & ss	21	3.1	left lower - image 31
126	ATDC5	CH & ss	21	2.85	left lower - image 31

## Sheet: Mean cilia length
	Cilia length (µm)
	Day 0 uninduced no ss	Day 0 uninduced	Day 7 uninduced	Day 7 CH	Day 14 uninduced	Day 14 CH	Day 21 uninduced	Day 21 CH
Mean	2.677	2.551	2.554	3.005	3.065	4.09	2.548	3.247
SEM	0.02975	0.03685	0.03113	0.04124	0.05014	0.112	0.03849	0.04171

## Sheet: Cilia no.
							Percent cilia
Cell line	Treatment	No. of cells	Cells with PC	% Cells with PC			Day 0 uninduced no ss	Day 0 uninduced	Day 7 uninduced	Day 7 CH	Day 14 uninduced	Day 14 CH	Day 21 uninduced	Day 21 CH
ATDC5	day 0 no ss	109	97	89		Mean	83.9	80.27	81.87	88.33	86.07	86.83	81.03	82.1
ATDC5	day 0 no ss	100	84	84		SEM	2.974	2.691	0.636	1.713	1.129	0.6642	2.217	1.744
ATDC5	day 0 no ss	108	85	78.7
	Total	317
						PC: primary cilia
ATDC5	day 0 uninduced & ss	209	167	79.9
ATDC5	day 0 uninduced & ss	194	147	75.8		ss: serum starved
ATDC5	day 0 uninduced & ss	101	86	85.1
	Total	504
ATDC5	day 7 uninduced & ss	187	153	81.8
ATDC5	day 7 uninduced & ss	240	194	80.8
ATDC5	day 7 uninduced & ss	100	83	83
	Total	527
ATDC5	day 7 CH & ss	166	143	86.1
ATDC5	day 7 CH & ss	121	111	91.7
ATDC5	day 7 CH & ss	109	95	87.2
	Total	396
ATDC5	day 14 uninduced & ss	138	121	87.7
ATDC5	day 14 uninduced & ss	149	129	86.6
ATDC5	day 14 uninduced & ss	137	115	83.9
	Total	424
ATDC5	day 14 CH & ss	136	118	86.8
ATDC6	day 14 CH & ss	158	139	88
ATDC6	day 14 CH & ss	112	96	85.7
	Total	406
ATDC5	day 21 uninduced & ss	196	163	83.2
ATDC5	day 21 uninduced & ss	154	118	76.6
ATDC5	day 21 uninduced & ss	144	120	83.3
	Total	494
ATDC5	day 21 CH & ss	192	163	84.9
ATDC5	day 21 CH & ss	189	156	82.5
ATDC5	day 21 CH & ss	95	75	78.9
	Total	476
