# Supplementary material for: Characterization of primary cilia features reveal cell-type specific variability in in vitro models of osteogenic and chondrogenic differentiation
Source: PeerJ. 2020 Aug 21;8:e9799. doi: 10.7717/peerj.9799 (PMC7444507; doi:10.7717/peerj.9799)
Supplement: Supplemental Information 15 [file peerj-08-9799-s015.xlsx]

## Sheet: Day 0 no ss
Sl no.	Cell line	Treatment type	Day	Cilia length (Arl13B)	Cilia length (acTub)	Comments
							ss: serum starved
1	ATDC5	none	0	2.6	2.5	mid upper - image 1a
2	ATDC5	none	0	2.9	2.8	below no. 1 - image 1a	pixel: 0.07206 um
3	ATDC5	none	0	2.7	2.4	leftish lower mid - image 1a	1 um: 13.877 pixels
4	ATDC5	none	0	2.8	2.5	left upper mid -image 1a
5	ATDC5	none	0	3.1	2.7	left of no. 4 - image 1a
6	ATDC5	none	0	3.3	3.1	mid left edge - image 1a
7	ATDC5	none	0	3.1	2.9	lower right of no. 6 - image 1a
8	ATDC5	none	0	3.9	3.8	right lower corner - image 1a
9	ATDC5	none	0	3.2	2.7	below no. 8 - image 1a
10	ATDC5	none	0	2.5	2.4	right mid - image 1a
11	ATDC5	none	0	2.7	2.4	below no. 10 - image 1a
12	ATDC5	none	0	3	2.9	top left upper - image 2a
13	ATDC5	none	0	3	2.8	rightist upper mid - image 2a	)
14	ATDC5	none	0	2.8	2.7	right of no. 13 - image 2a
15	ATDC5	none	0	3.3	3.4	right of no. 13 - image 2a
16	ATDC5	none	0	3	2.8	below no. 15 - image 2a
17	ATDC5	none	0	2.4	2.3	below no. 13 - image 2a
18	ATDC5	none	0	2.5	2.5	below no. 17 - image 2a
19	ATDC5	none	0	2.9	2.8	left mid - image 2a
20	ATDC5	none	0	2.7	2.7	left lower edge - image 2a
21	ATDC5	none	0	2.8	2.7	mid bottom edge - image 2a
22	ATDC5	none	0	2.4	2.3	above no. 21 - image 2a
23	ATDC5	none	0	2.6	2.6	above rightish no. 22 - image 2a
24	ATDC5	none	0	2.6	2.4	top right edge - image 3a
25	ATDC5	none	0	2.3	2.2	mid rightish - image 3b
26	ATDC5	none	0	2.8	2.6	left mid - image 3b
27	ATDC5	none	0	2.5	2.4	below no. 26 - image 3b
28	ATDC5	none	0	2.9	2.8	mid bottom edge - image 3b
29	ATDC5	none	0	2.6	2.3	right lower mid - image 3b
30	ATDC5	none	0	2.5	2.4	right bottom - image 3b
31	ATDC5	none	0	2.6	2.5	rightish mid duo - image 4a
32	ATDC5	none	0	2.8	2.6	rightish mid duo - image 4a
33	ATDC5	none	0	2.3	2.3	left mid -image 4a
34	ATDC5	none	0	3	2.8	top mid edge - image 4b
35	ATDC5	none	0	3	2.9	top rightish - image 4b
36	ATDC5	none	0	3.4	3.2	right lower edge - image 4b
37	ATDC5	none	0	2.8	2.6	below no. 36 - image 4b
38	ATDC5	none	0	3.7	3.4	left of no. 37 - image 4b
39	ATDC5	none	0	2.5	2.3	mid lower - image 4b
40	ATDC5	none	0	2.7	2.7	left upper mid - image 4b

## Sheet: Day 0 ss
Sl no.	Cell line	Treatment	Day	Cilia length (Arl13B)	Cilia length (acTub)	Comments
							ss: serum starved
1	ATDC5	uninduced & ss	0	2.9	3	left lower - image 1
2	ATDC5	uninduced & ss	0	2.8	2.8	left top - image 1	pixel: 0.07206 um
3	ATDC5	uninduced & ss	0	2.6	2.4	leftish lower mid - image 1	1 um: 13.877 pixels
4	ATDC5	uninduced & ss	0	3.1	2.8	right top - image 1
5	ATDC5	uninduced & ss	0	3.1	3	leftish upper mid - image 2a
6	ATDC5	uninduced & ss	0	2.8	2.7	right upper mid - image 2a
7	ATDC5	uninduced & ss	0	3.2	3.3	rightish mid lower - image 2a
8	ATDC5	uninduced & ss	0	3.3	3.3	left mid edge - image 2b
9	ATDC5	uninduced & ss	0	2.8	2.7	mid - image 2b
10	ATDC5	uninduced & ss	0	3.1	2.8	top right - image 3a
11	ATDC5	uninduced & ss	0	2.7	2.5	left mid edge - image 3a
12	ATDC5	uninduced & ss	0	2.8	2.6	above no. 11 - image 3a
13	ATDC5	uninduced & ss	0	2.6	2.5	right of no. 12 - image 3a
14	ATDC5	uninduced & ss	0	2.5	2.3	right lower - image 3b
15	ATDC5	uninduced & ss	0	2.9	2.9	mid lower - image 3b
16	ATDC5	uninduced & ss	0	2.7	2.5	left bottom edge - image 3b
17	ATDC5	uninduced & ss	0	2.3	2.3	above no. 16 - image 3b
18	ATDC5	uninduced & ss	0	2.6	2.6	Right upper mid - image 4a
19	ATDC5	uninduced & ss	0	3	2.9	mid - image 4a
20	ATDC5	uninduced & ss	0	3	2.8	left top mid - image 4a
21	ATDC5	uninduced & ss	0	2.7	2.5	left mid edge - image 4a
22	ATDC5	uninduced & ss	0	2.7	2.6	left lower - image 5a
23	ATDC5	uninduced & ss	0	2.7	2.7	right top mid - image 5b
24	ATDC5	uninduced & ss	0	2.8	2.7	mid bottom duo - image 5b
25	ATDC5	uninduced & ss	0	2.6	2.4	mid bottom duo - image 5b
26	ATDC5	uninduced & ss	0	2.4	2.4	left mid - image 5b
27	ATDC5	uninduced & ss	0	2.7	2.5	leftish mid - image 6a
28	ATDC5	uninduced & ss	0	2.8	2.6	right lower corner - image 6a
29	ATDC5	uninduced & ss	0	2.6	2.5	left lower corner - image 6a
30	ATDC5	uninduced & ss	0	2.8	2.7	mid bottom - image 7b
31	ATDC5	uninduced & ss	0	2.5	2.3	mid upper - image 7b
32	ATDC5	uninduced & ss	0	2.8	2.6	rightish mid - image 7a
33	ATDC5	uninduced & ss	0	2.5	2.4	mid bottom - image 7a
34	ATDC5	uninduced & ss	0	2.8	2.6	right top - image 8a
35	ATDC5	uninduced & ss	0	2.7	2.6	right mid edge - image 8a
36	ATDC5	uninduced & ss	0	2.3	2.3	left top duo - image 8a
37	ATDC5	uninduced & ss	0	2.4	2.3	left top duo - image 8a
38	ATDC5	uninduced & ss	0	3.2	3.1	leftish mid - image 8b
39	ATDC5	uninduced & ss	0	2.9	2.9	below no. 38 - image 8b
40	ATDC5	uninduced & ss	0	2.7	2.7	mid bottom - image 8b

## Sheet: Day 7
Sl no.	Cell line	Treatment	Day	Cilia length (Arl13B)	Cilia length (acTub)	Comments
							ss: serum starved
1	ATDC5	uninduced & ss	7	2.8	2.6	top right - image 1a
2	ATDC5	uninduced & ss	7	2.9	2.7	right bottom - image 1a	pixel: 0.07206 um
3	ATDC5	uninduced & ss	7	2.9	2.9	left mid edge - image 1a	1 um: 13.877 pixels
4	ATDC5	uninduced & ss	7	2.5	2.5	mid lower - image 1a
5	ATDC5	uninduced & ss	7	2.5	2.5	right lower duo - image 2
6	ATDC5	uninduced & ss	7	2.3	2.2	right lower duo - image 2
7	ATDC5	uninduced & ss	7	2.2	2.2	left mid - image 3
8	ATDC5	uninduced & ss	7	2.2	2.2	left mid - image 3
9	ATDC5	uninduced & ss	7	2.8	2.6	rightish mid - image 4c
10	ATDC5	uninduced & ss	7	2.7	2.5	mid bottom - image 4b
11	ATDC5	uninduced & ss	7	2.9	2.7	left lower - image 4a
12	ATDC5	uninduced & ss	7	2.8	2.7	left upper edge - image 4a
13	ATDC5	uninduced & ss	7	2.8	2.9	leftish upper mid - image 4a
14	ATDC5	uninduced & ss	7	2.7	2.5	top mid edge - image 4a
15	ATDC5	uninduced & ss	7	2.3	2.3	rightish mid - image 4a
16	ATDC5	uninduced & ss	7	2.5	2.5	left of no. 14 - image 14a
17	ATDC5	uninduced & ss	7	2.7	2.6	top mid - image 5a
18	ATDC5	uninduced & ss	7	2.9	2.9	leftish mid - image 5a
19	ATDC5	uninduced & ss	7	2.7	2.5	mid lower - image 5a
20	ATDC5	uninduced & ss	7	2.6	2.6	left bottom - image 5a
21	ATDC5	uninduced & ss	7	2.4	2.3	right mid edge - image 5a
22	ATDC5	uninduced & ss	7	2.7	2.6	mid upper - image 5b
23	ATDC5	uninduced & ss	7	3.4	3.2	below no. 22 - image 5b
24	ATDC5	uninduced & ss	7	2.7	2.7	mid lower - image 5b
25	ATDC5	uninduced & ss	7	2.9	2.8	right of no. 24 - image 5b
26	ATDC5	uninduced & ss	7	2.9	2.8	left upper mid - image 5b
27	ATDC5	uninduced & ss	7	3.2	3.1	lower rightish mid - image 6a
28	ATDC5	uninduced & ss	7	2.8	2.8	right of no. 27 - image 6a
29	ATDC5	uninduced & ss	7	2.7	2.5	left upper mid - image 6a
30	ATDC5	uninduced & ss	7	2.6	2.6	mid bottom - image 6a
31	ATDC5	uninduced & ss	7	2.9	2.8	left bottom - image 6a
32	ATDC5	uninduced & ss	7	2.7	2.5	top mid edge - image 6b
33	ATDC5	uninduced & ss	7	2.9	2.7	rightish mid - image 7a
34	ATDC5	uninduced & ss	7	2.6	2.5	right of no. 33 - image 7a
35	ATDC5	uninduced & ss	7	2.6	2.4	right bottom - image 7a
36	ATDC5	uninduced & ss	7	3.2	3.1	right top edge - image 7b
37	ATDC5	uninduced & ss	7	3	2.8	mid - image 8a
38	ATDC5	uninduced & ss	7	2.9	2.8	lower mid - image 8a
39	ATDC5	uninduced & ss	7	3.3	3.1	right lower corner - image 8a
40	ATDC5	uninduced & ss	7	3	3	left lower corner - image 8a
Sl no.	Cell line	Treatment	Day	Cilia length (Arl13B)	Cilia length (acTub)	Comments
1	ATDC5	CH induced & ss	7	3	2.9	mid - image 1a
2	ATDC5	CH induced & ss	7	2.8	2.6	above right of no. 1 - image 1a
3	ATDC5	CH induced & ss	7	2.9	3	right lower corner - image 1a
4	ATDC5	CH induced & ss	7	2.8	2.5	left upper mid - image 1a
5	ATDC5	CH induced & ss	7	2.9	2.8	right top edge - image 1b
6	ATDC5	CH induced & ss	7	3	3.1	right of no. 5 - image 1b
7	ATDC5	CH induced & ss	7	2.9	2.9	right bottom edge - image 1b
8	ATDC5	CH induced & ss	7	3.7	3.5	mid top - image 2a
9	ATDC5	CH induced & ss	7	3.1	3	left of no. 7 - image 2a
10	ATDC5	CH induced & ss	7	3	3	right mid edge - image 2a
11	ATDC5	CH induced & ss	7	3	2.9	right upper mid - image 2a
12	ATDC5	CH induced & ss	7	3.3	3.4	right lower - image 2b
13	ATDC5	CH induced & ss	7	3.1	3	left mid - image 2b
14	ATDC5	CH induced & ss	7	3.5	3.3	left mid - image 3a
15	ATDC5	CH induced & ss	7	3.3	3.1	left mid edge - image 3a
16	ATDC5	CH induced & ss	7	3.4	3.2	mid lower - image 3b
17	ATDC5	CH induced & ss	7	3.5	3.4	right top edge - image 3b
18	ATDC5	CH induced & ss	7	3.3	3.2	top mid edge - image 4a
19	ATDC5	CH induced & ss	7	3.6	3.5	leftish mid - image 4b
20	ATDC5	CH induced & ss	7	4.1	3.9	mid - image 4b
21	ATDC5	CH induced & ss	7	3.3	3.4	left lower - image 4b
22	ATDC5	CH induced & ss	7	3.3	3.2	left top corner - image 5b
23	ATDC5	CH induced & ss	7	2.8	2.7	mid upper - image 5b
24	ATDC5	CH induced & ss	7	3.3	3.2	lower mid rightish - image 6a
25	ATDC5	CH induced & ss	7	3.3	3.1	mid bottom - image 6a
26	ATDC5	CH induced & ss	7	2.9	3.1	left top corner - image 6a
27	ATDC5	CH induced & ss	7	3.1	3.1	right mid - image 6b
28	ATDC5	CH induced & ss	7	3.2	3.1	mid top - image 7a
29	ATDC5	CH induced & ss	7	3.6	3.4	right mid - image 7a
30	ATDC5	CH induced & ss	7	3	3.1	left bottom - image 7a
31	ATDC5	CH induced & ss	7	3.4	3.3	left upper trio - image 7a
32	ATDC5	CH induced & ss	7	3.1	3	left upper trio - image 7a
33	ATDC5	CH induced & ss	7	3.4	3.3	left upper trio - image 7a
34	ATDC5	CH induced & ss	7	3.2	3	left of no. 28 - image 7a
35	ATDC5	CH induced & ss	7	3.4	3.2	left lower corner - image 7b
36	ATDC5	CH induced & ss	7	3.2	2.9	mid bottom - image 7b
37	ATDC5	CH induced & ss	7	3.4	3.2	top left corner - image 8a
38	ATDC5	CH induced & ss	7	3.1	3	right of no. 36 - image 8a
39	ATDC5	CH induced & ss	7	3.2	3.1	right mid - image 8a
40	ATDC5	CH induced & ss	7	3.4	3.3	left bottom corner - image 8a
