# Supplementary material for: Characterization of primary cilia features reveal cell-type specific variability in in vitro models of osteogenic and chondrogenic differentiation
Source: PeerJ. 2020 Aug 21;8:e9799. doi: 10.7717/peerj.9799 (PMC7444507; doi:10.7717/peerj.9799)
Supplement: Supplemental Information 18 [file peerj-08-9799-s018.xlsx]

## Sheet: MC3T3 Day 0 no ss
Sl no.	Cell line	Treatment type	Day	Cilia length (acTub)	Comments
								ss: serum starved
1	MC3T3-E1	none	0	2	top right - image 1a	set 1
2	MC3T3-E1	none	0	2.3	right mid - image1a			pixel: 0.07206 um
3	MC3T3-E1	none	0	2.2	right bottom - image 1a			1 um: 13.877 pixels
4	MC3T3-E1	none	0	2.2	left mid - image 1a
5	MC3T3-E1	none	0	2.6	mid top - image 2a
6	MC3T3-E1	none	0	2.3	right top - image 2a
7	MC3T3-E1	none	0	2.6	left top - image 2a
8	MC3T3-E1	none	0	2.3	left mid - image 2a
9	MC3T3-E1	none	0	2	top right - image 3a
10	MC3T3-E1	none	0	2	right mid - image 3a
11	MC3T3-E1	none	0	2	above no. 10 left - image 3a
12	MC3T3-E1	none	0	1.8	left og no. 9 - image 3a
13	MC3T3-E1	none	0	2	mid - image 4
14	MC3T3-E1	none	0	2.3	top mid - image 4
15	MC3T3-E1	none	0	2	right lower mid - image 4
16	MC3T3-E1	none	0	1.7	right mid edge - image 4
17	MC3T3-E1	none	0	2	left mid - image 4
18	MC3T3-E1	none	0	2.1	left bottom - image 4
19	MC3T3-E1	none	0	2.1	rightish mid bottom edge - image 4
20	MC3T3-E1	none	0	1.9	top mid - image 5a
21	MC3T3-E1	none	0	2.8	mid - image 5a
22	MC3T3-E1	none	0	2.6	left mid - image 5a
23	MC3T3-E1	none	0	2.5	mid bottom - image 5a
24	MC3T3-E1	none	0	2	top left - image 5a
25	MC3T3-E1	none	0	2	center - image 5b
26	MC3T3-E1	none	0	2.2	left bottom - image 5b	set 2
27	MC3T3-E1	none	0	2	upper mid - image 6a
28	MC3T3-E1	none	0	2.5	above no. 27 - image 6a
29	MC3T3-E1	none	0	1.9	upper right - image 6a
30	MC3T3-E1	none	0	2.4	left mid edge - image 6a
31	MC3T3-E1	none	0	2.2	left bottom - image 6a
32	MC3T3-E1	none	0	2.3	rightish mid lower - image 6a
33	MC3T3-E1	none	0	2.1	right of no. 32 - image 6a
34	MC3T3-E1	none	0	1.9	right bottom corner - image 6a
35	MC3T3-E1	none	0	2.5	next to no. 29 - image 6b
36	MC3T3-E1	none	0	2.2	left lower - image 6b
37	MC3T3-E1	none	0	1.7	right of no. 36 - image 6b
38	MC3T3-E1	none	0	2.1	mid - image 7a
39	MC3T3-E1	none	0	1.9	leftish mid top - image 7a
40	MC3T3-E1	none	0	2.3	left mid edge duo - image 7a
41	MC3T3-E1	none	0	2.1	left mid edge duo - image 7a
42	MC3T3-E1	none	0	1.8	below no. 41 - image 7a
43	MC3T3-E1	none	0	2.4	lower mid - image 7a
44	MC3T3-E1	none	0	2.2	right top edge - image 7a
45	MC3T3-E1	none	0	1.8	rightish mid top - image 7a
46	MC3T3-E1	none	0	2	center - image 8a
47	MC3T3-E1	none	0	2	left of no. 45 - image 8a
48	MC3T3-E1	none	0	2.3	left mid edge - image 8a
49	MC3T3-E1	none	0	2.1	top right - image 8b
50	MC3T3-E1	none	0	1.9	below no. 50 - image 8b
51	MC3T3-E1	none	0	2	right mid - image 8b
52	MC3T3-E1	none	0	1.9	top mid - image 9a
53	MC3T3-E1	none	0	2.2	mid - image 9b
54	MC3T3-E1	none	0	2	left mid edge - image 9b
55	MC3T3-E1	none	0	2.2	above no. 54 - image 9b
56	MC3T3-E1	none	0	2.3	right mid - image 9b
57	MC3T3-E1	none	0	2.4	mid bottom - image 10a
58	MC3T3-E1	none	0	3	right lower edge - image 10a
59	MC3T3-E1	none	0	2.2	right mid - image 10b
60	MC3T3-E1	none	0	2	right top edge - image 10b
61	MC3T3-E1	none	0	2.1	left mid edge - image 10b	set 3
62	MC3T3-E1	none	0	2.1	left mid - image 10b
63	MC3T3-E1	none	0	2.1	top mid - image 10b
64	MC3T3-E1	none	0	2.2	mid bottom - image 11
65	MC3T3-E1	none	0	2.6	right lower corner - image 11
66	MC3T3-E1	none	0	2.4	right top edge - image 11
67	MC3T3-E1	none	0	2.3	left top edge - image 11
68	MC3T3-E1	none	0	2.3	left of no. 64 - image 11
69	MC3T3-E1	none	0	2.4	right upper - image 11
70	MC3T3-E1	none	0	2.3	right upper - image 12
71	MC3T3-E1	none	0	2	right of no. 70 - image 12
72	MC3T3-E1	none	0	1.8	right mid - image 12
73	MC3T3-E1	none	0	2	below no. 72 - image 12
74	MC3T3-E1	none	0	2.3	right lower corner - image 12
75	MC3T3-E1	none	0	2.5	left lower - image 12
76	MC3T3-E1	none	0	1.8	left top edge - image 12
77	MC3T3-E1	none	0	1.9	top edge duo - image 12
78	MC3T3-E1	none	0	1.8	top edge duo - image 12
79	MC3T3-E1	none	0	3	top left edge - image 13
80	MC3T3-E1	none	0	2.3	left mid - image 13
81	MC3T3-E1	none	0	2.1	left top edge - image 13
82	MC3T3-E1	none	0	2.1	left top edge - image 13
83	MC3T3-E1	none	0	2.7	right top edge - image 13
84	MC3T3-E1	none	0	2.4	right top edge - image 13
85	MC3T3-E1	none	0	2.7	mid bottom - image 13
86	MC3T3-E1	none	0	2.4	right of no. 85 - image 13
87	MC3T3-E1	none	0	2.3	right of no. 86 - image 13
88	MC3T3-E1	none	0	2.8	top edge - image 13
89	MC3T3-E1	none	0	2.4	left bottom - image 13
90	MC3T3-E1	none	0	2.4	mid - image 14
91	MC3T3-E1	none	0	2.2	left upper - image 14
92	MC3T3-E1	none	0	2.4	left mid edge - image 14
93	MC3T3-E1	none	0	2.2	above no. 92 - image 14
94	MC3T3-E1	none	0	2.1	top mid edge - image 14
95	MC3T3-E1	none	0	2.3	mid bottom edge - image 14
96	MC3T3-E1	none	0	2.4	mid - image 15
97	MC3T3-E1	none	0	2.8	mid - image 15
98	MC3T3-E1	none	0	2.9	right lower mid - image 15
99	MC3T3-E1	none	0	2	right bottom - image 15
100	MC3T3-E1	none	0	2.6	left mid - image 15
101	MC3T3-E1	none	0	2.1	left lower edge - image 15

## Sheet: MC3T3 day 0
Sl no.	Cell line	Treatment type	Day	Cilia length	Comments
1	MC3T3-E1	uninduced & ss	0	2.91	middle top left - image 1	set 1		ss: serum starved
2	MC3T3-E1	uninduced & ss	0	2.17	middle - image 1
3	MC3T3-E1	uninduced & ss	0	2.3	middle - image 2			pixel: 0.07206 um
4	MC3T3-E1	uninduced & ss	0	2.95	middle right - image 2			1 um: 13.877 pixels
5	MC3T3-E1	uninduced & ss	0	2.36	bottom slightly right - image 2
6	MC3T3-E1	uninduced & ss	0	2.78	left mid top - image 2
7	MC3T3-E1	uninduced & ss	0	2.56	left mid lower - image 2
8	MC3T3-E1	uninduced & ss	0	2.56	middle - image 3
9	MC3T3-E1	uninduced & ss	0	3.3	middle right lower - image 3
10	MC3T3-E1	uninduced & ss	0	2.81	middle bottom - image 3
11	MC3T3-E1	uninduced & ss	0	2.88	middle - image 4
12	MC3T3-E1	uninduced & ss	0	2.6	middle bottom - image 4
13	MC3T3-E1	uninduced & ss	0	2.64	left middle - image 4
14	MC3T3-E1	uninduced & ss	0	2.58	middle - image 5
15	MC3T3-E1	uninduced & ss	0	2.94	right middle - image 5
16	MC3T3-E1	uninduced & ss	0	2.64	left bottom - image 5
17	MC3T3-E1	uninduced & ss	0	2.76	above no. 16 right side - image 5
18	MC3T3-E1	uninduced & ss	0	2.6	lower mid right - image 6
19	MC3T3-E1	uninduced & ss	0	2.65	mid bottom - image 6
20	MC3T3-E1	uninduced & ss	0	2.54	mid lower - image 7
21	MC3T3-E1	uninduced & ss	0	2.74	top right mid - image 7
22	MC3T3-E1	uninduced & ss	0	2.88	middle - image 8
23	MC3T3-E1	uninduced & ss	0	2.37	top right - image 8
24	MC3T3-E1	uninduced & ss	0	2.65	left bottom - image 8
25	MC3T3-E1	uninduced & ss	0	2.47	mid lower - image 9
26	MC3T3-E1	uninduced & ss	0	2.38	right middle - image 9
27	MC3T3-E1	uninduced & ss	0	2.35	top middle - image 9
28	MC3T3-E1	uninduced & ss	0	2.71	left middle - image 9
29	MC3T3-E1	uninduced & ss	0	2.64	middle lower - image 10
30	MC3T3-E1	uninduced & ss	0	2.8	left lower - image 10
31	MC3T3-E1	uninduced & ss	0	2.2	top left - image 10
32	MC3T3-E1	uninduced & ss	0	2.3	bottom left - image 1n
33	MC3T3-E1	uninduced & ss	0	2.54	above no. 32 - image 1n
34	MC3T3-E1	uninduced & ss	0	2.3	top right - image 1n
35	MC3T3-E1	uninduced & ss	0	3.1	mid - image 2n
36	MC3T3-E1	uninduced & ss	0	3	mid - image 3n
37	MC3T3-E1	uninduced & ss	0	2.2	left lower - image 3n
38	MC3T3-E1	uninduced & ss	0	4.4	mid - image 4n
39	MC3T3-E1	uninduced & ss	0	2.2	top right - image 4n
40	MC3T3-E1	uninduced & ss	0	3	mid top - image 4n
41	MC3T3-E1	uninduced & ss	0	3.2	mid - image 5n
42	MC3T3-E1	uninduced & ss	0	2.34	top mid - image 5n
43	MC3T3-E1	uninduced & ss	0	2.44	left mid - image 5n
44	MC3T3-E1	uninduced & ss	0	3.15	mid - image 6n
45	MC3T3-E1	uninduced & ss	0	2.71	top mid - image 6n
46	MC3T3-E1	uninduced & ss	0	3.1	mid bottom - image 6n
47	MC3T3-E1	uninduced & ss	0	3	mid - image 7n
48	MC3T3-E1	uninduced & ss	0	2.4	mid right - image 7n
49	MC3T3-E1	uninduced & ss	0	2.78	mid - image 8n
50	MC3T3-E1	uninduced & ss	0	2.3	right mid of no. 49 - image 8n
51	MC3T3-E1	uninduced & ss	0	3.1	mid - image 9n
52	MC3T3-E1	uninduced & ss	0	2.4	left bottom - image 9n
53	MC3T3-E1	uninduced & ss	0	2.3	right bottom - image 9n
54	MC3T3-E1	uninduced & ss	0	3.1	mid - image 10n
55	MC3T3-E1	uninduced & ss	0	2.7	left mid - image 10n
56	MC3T3-E1	uninduced & ss	0	3	mid right - image 11	set 2
57	MC3T3-E1	uninduced & ss	0	2.2	right bottom corner - image 11
58	MC3T3-E1	uninduced & ss	0	2.3	mid bottom - image 11
59	MC3T3-E1	uninduced & ss	0	2.52	left mid upper - image 11
60	MC3T3-E1	uninduced & ss	0	2.4	left mid lower - image 11
61	MC3T3-E1	uninduced & ss	0	2.4	mid - image 12
62	MC3T3-E1	uninduced & ss	0	3	lower right mid - image 12
63	MC3T3-E1	uninduced & ss	0	2.4	mid bottom - image 12
64	MC3T3-E1	uninduced & ss	0	2.4	mid - image 13
65	MC3T3-E1	uninduced & ss	0	2.1	mid bottom - image 13
66	MC3T3-E1	uninduced & ss	0	2.3	left mid - image 13
67	MC3T3-E1	uninduced & ss	0	2.3	mid lower rightish - image 14
68	MC3T3-E1	uninduced & ss	0	2.2	right top - image 14
69	MC3T3-E1	uninduced & ss	0	2.4	left top - image 14
70	MC3T3-E1	uninduced & ss	0	2.5	left bottom - image 14
71	MC3T3-E1	uninduced & ss	0	2.3	top mid - image 15
72	MC3T3-E1	uninduced & ss	0	2.5	mid bottom - image 15
73	MC3T3-E1	uninduced & ss	0	2.4	right lower mid - image 15
74	MC3T3-E1	uninduced & ss	0	2.6	left bottom - image 15
75	MC3T3-E1	uninduced & ss	0	2.2	mid top - image 16
76	MC3T3-E1	uninduced & ss	0	2.7	mid leftish - image 16
77	MC3T3-E1	uninduced & ss	0	2.5	left bottom corner - image 16
78	MC3T3-E1	uninduced & ss	0	2.4	mid left lower - image 17
79	MC3T3-E1	uninduced & ss	0	2.4	mid top right - image 17
80	MC3T3-E1	uninduced & ss	0	3.1	mid leftish - image 18
81	MC3T3-E1	uninduced & ss	0	2.5	mid bottom - image 18
82	MC3T3-E1	uninduced & ss	0	2.6	right mid - image 18
83	MC3T3-E1	uninduced & ss	0	2.4	mid - image 19
84	MC3T3-E1	uninduced & ss	0	2.7	mid right - image 19
85	MC3T3-E1	uninduced & ss	0	2.5	bottom left - image 19
86	MC3T3-E1	uninduced & ss	0	1.9	mid - image 20
87	MC3T3-E1	uninduced & ss	0	2.5	mid left top - image 20
88	MC3T3-E1	uninduced & ss	0	3.7	mid upper - image 21	set 3
89	MC3T3-E1	uninduced & ss	0	2.5	below no. 88 - image 21
90	MC3T3-E1	uninduced & ss	0	3.1	left bottom - image 21
91	MC3T3-E1	uninduced & ss	0	3.2	right bottom - image 21
92	MC3T3-E1	uninduced & ss	0	3.7	right mid edge - image 21
93	MC3T3-E1	uninduced & ss	0	3.3	right top edge - image 21
94	MC3T3-E1	uninduced & ss	0	4.5	right bottom corner - image 22
95	MC3T3-E1	uninduced & ss	0	4.4	left bottom edge - image 22
96	MC3T3-E1	uninduced & ss	0	2.9	left mid edge - image 23
97	MC3T3-E1	uninduced & ss	0	3	lower mid - image 23
98	MC3T3-E1	uninduced & ss	0	2.8	right lower - image 23
99	MC3T3-E1	uninduced & ss	0	4.6	mid upper - image 23
100	MC3T3-E1	uninduced & ss	0	3	upper mid leftish - image 24
101	MC3T3-E1	uninduced & ss	0	3.8	upper mid rightish - image 24
102	MC3T3-E1	uninduced & ss	0	3	right of no. 101 - image 24
103	MC3T3-E1	uninduced & ss	0	3.6	rightish mid - image 24
104	MC3T3-E1	uninduced & ss	0	3.2	left mid - image 24
105	MC3T3-E1	uninduced & ss	0	4	top mid - image 25
105	MC3T3-E1	uninduced & ss	0	4.4	rightish mid upper - image 25
107	MC3T3-E1	uninduced & ss	0	3.7	left mid edge - image 25
108	MC3T3-E1	uninduced & ss	0	3.1	left bottom corner - image 25
109	MC3T3-E1	uninduced & ss	0	2.5	mid lower - image 26
110	MC3T3-E1	uninduced & ss	0	4.4	left mid - image 26
111	MC3T3-E1	uninduced & ss	0	3.2	right upper - image 26
112	MC3T3-E1	uninduced & ss	0	2.5	below no. 107 - image 26
113	MC3T3-E1	uninduced & ss	0	2.8	right mid edge - image 27
114	MC3T3-E1	uninduced & ss	0	3.2	left upper edge - image 27
115	MC3T3-E1	uninduced & ss	0	4	mid - image 27
116	MC3T3-E1	uninduced & ss	0	3.5	right lower edge - image 27
117	MC3T3-E1	uninduced & ss	0	2.8	right lower - image 28
118	MC3T3-E1	uninduced & ss	0	3	right upper - image 28
119	MC3T3-E1	uninduced & ss	0	4.6	mid - image 28
120	MC3T3-E1	uninduced & ss	0	4	left lower - image 28
121	MC3T3-E1	uninduced & ss	0	3.9	left mid - image 28
122	MC3T3-E1	uninduced & ss	0	2.9	rightish mid upper - image 29
123	MC3T3-E1	uninduced & ss	0	4	leftish mid - image 29
124	MC3T3-E1	uninduced & ss	0	3.6	rightish mid lower - image 29
125	MC3T3-E1	uninduced & ss	0	3.8	left lower - image 29
126	MC3T3-E1	uninduced & ss	0	3.6	mid lower - image 30

## Sheet: MC3T3 day 7
Sl no.	Cell line	Treatment type	Day	Cilia length	Comments
1	MC3T3-E1	uninduced & ss	7	3.25	middle cell - image 1	set 1	ss: serum starved
2	MC3T3-E1	uninduced & ss	7	2.6	left of middle cell - image 1
3	MC3T3-E1	uninduced & ss	7	2.55	left bottom cell - image 1		pixel: 0.07206 um
4	MC3T3-E1	uninduced & ss	7	2.77	middle cell - image 2		1 um: 13.877 pixels
5	MC3T3-E1	uninduced & ss	7	2.67	middle right - image 2
6	MC3T3-E1	uninduced & ss	7	3	middle left - image 2
7	MC3T3-E1	uninduced & ss	7	3.17	middle - image 3
8	MC3T3-E1	uninduced & ss	7	2.83	middle left - image 3
9	MC3T3-E1	uninduced & ss	7	2.42	middle left bottom - image 3
10	MC3T3-E1	uninduced & ss	7	2.52	right bottom - image 3
11	MC3T3-E1	uninduced & ss	7	3.74	middle - image 4
12	MC3T3-E1	uninduced & ss	7	2.62	middle right - image 4
13	MC3T3-E1	uninduced & ss	7	2.01	middle left bottomish - image 4
14	MC3T3-E1	uninduced & ss	7	2.35	middle left - image 4
15	MC3T3-E1	uninduced & ss	7	2.54	middle left (left of no. 14) - image 4
16	MC3T3-E1	uninduced & ss	7	2.73	top middle right - image 4
17	MC3T3-E1	uninduced & ss	7	2.81	top middle - image 5
18	MC3T3-E1	uninduced & ss	7	3.04	top left - image 5
19	MC3T3-E1	uninduced & ss	7	3.78	middle left (left most) - image 5
20	MC3T3-E1	uninduced & ss	7	2.16	right middle - image 5
21	MC3T3-E1	uninduced & ss	7	3.2	middle - image 6
22	MC3T3-E1	uninduced & ss	7	2.4	middle bottom - image 6
23	MC3T3-E1	uninduced & ss	7	2.5	middle top - image 6
24	MC3T3-E1	uninduced & ss	7	1.85	left bottom - image 6
25	MC3T3-E1	uninduced & ss	7	3.78	middle - image 7
26	MC3T3-E1	uninduced & ss	7	2.2	middle (below no. 26) - image 7
27	MC3T3-E1	uninduced & ss	7	3.4	right middle (top) - image 7
28	MC3T3-E1	uninduced & ss	7	2.5	right middle (below no. 28) - image 7
29	MC3T3-E1	uninduced & ss	7	3	right middle (below no.s. 28, 29) - image 7
30	MC3T3-E1	uninduced & ss	7	2.67	right top (above nos. 28, 29) - image 7
31	MC3T3-E1	uninduced & ss	7	3.57	left top - image 8
32	MC3T3-E1	uninduced & ss	7	3.34	top middle - image 8
33	MC3T3-E1	uninduced & ss	7	3.68	middle - image 8
34	MC3T3-E1	uninduced & ss	7	3.7	below no. 34 (left) - image 8
35	MC3T3-E1	uninduced & ss	7	3.67	middle - image 9
36	MC3T3-E1	uninduced & ss	7	3.3	right middle - image 9
37	MC3T3-E1	uninduced & ss	7	3.53	bottom middle right - image 9
38	MC3T3-E1	uninduced & ss	7	4.05	middle - image 10
39	MC3T3-E1	uninduced & ss	7	2.43	left middle (top) - image 10
40	MC3T3-E1	uninduced & ss	7	2.94	left middle (below) - image 10
41	MC3T3-E1	uninduced & ss	7	3.19	bottom extreme left - image 10
42	MC3T3-E1	uninduced & ss	7	3.1	bottom middle left - image 10
43	MC3T3-E1	uninduced & ss	7	2.61	middle right - image 10
44	MC3T3-E1	uninduced & ss	7	2.7	Top mid - image 11	set 2
45	MC3T3-E1	uninduced & ss	7	4.3	top right - image 11
46	MC3T3-E1	uninduced & ss	7	3	mid right - image 11
47	MC3T3-E1	uninduced & ss	7	2.8	mid right edge - image 11
48	MC3T3-E1	uninduced & ss	7	2.7	mid bottom - image 11
49	MC3T3-E1	uninduced & ss	7	3.1	left top edge - image 11
50	MC3T3-E1	uninduced & ss	7	3.5	mid left edge - image 11
51	MC3T3-E1	uninduced & ss	7	3.3	top right corner - image 12
52	MC3T3-E1	uninduced & ss	7	3.3	mid rightish - image 12
53	MC3T3-E1	uninduced & ss	7	3.9	right lower - image 12
54	MC3T3-E1	uninduced & ss	7	3.1	below no. 54 - image 12
55	MC3T3-E1	uninduced & ss	7	3.7	left mid - image 12
56	MC3T3-E1	uninduced & ss	7	4.4	left corner - image 12
57	MC3T3-E1	uninduced & ss	7	3.2	top mid left - image 12
58	MC3T3-E1	uninduced & ss	7	2.6	mid left edge - image 12
59	MC3T3-E1	uninduced & ss	7	2.4	left of no. 58 - image 12
60	MC3T3-E1	uninduced & ss	7	3.5	left mid - image 13
61	MC3T3-E1	uninduced & ss	7	4	right upper mid - image 13
62	MC3T3-E1	uninduced & ss	7	3.8	right bottom - image 13
63	MC3T3-E1	uninduced & ss	7	3.3	mid right - image 14
64	MC3T3-E1	uninduced & ss	7	2.7	top right - image 14
65	MC3T3-E1	uninduced & ss	7	2.9	corner bottom right - image 14
66	MC3T3-E1	uninduced & ss	7	2.7	right mid bottom edge - image 14
67	MC3T3-E1	uninduced & ss	7	3	left lower middle edge - image 14
68	MC3T3-E1	uninduced & ss	7	3.1	mid - image 14
69	MC3T3-E1	uninduced & ss	7	3.2	mid - image 15
70	MC3T3-E1	uninduced & ss	7	3.3	mid lower left - image 15
71	MC3T3-E1	uninduced & ss	7	2.5	left of no. 71 - image 15
72	MC3T3-E1	uninduced & ss	7	4.3	left of no. 69 - image 15
73	MC3T3-E1	uninduced & ss	7	4.1	above no. 73 - image 15
74	MC3T3-E1	uninduced & ss	7	3.7	mid upper - image 16
75	MC3T3-E1	uninduced & ss	7	2.6	mid lower - image 16
76	MC3T3-E1	uninduced & ss	7	2.9	mid left - image 16
77	MC3T3-E1	uninduced & ss	7	2.9	left lower corner - image 16
78	MC3T3-E1	uninduced & ss	7	3.9	left of no. 78 - image 16
79	MC3T3-E1	uninduced & ss	7	4.4	right of no. 78 - image 16
80	MC3T3-E1	uninduced & ss	7	3.1	mid left - image 17
81	MC3T3-E1	uninduced & ss	7	2.6	left below no. 81 - image 17
82	MC3T3-E1	uninduced & ss	7	2.8	left of 82. - image 17
83	MC3T3-E1	uninduced & ss	7	3.2	left lower mid edge - image 17
84	MC3T3-E1	uninduced & ss	7	2.8	mid bottom left - image 17
85	MC3T3-E1	uninduced & ss	7	3.9	top right mid - image 17
86	MC3T3-E1	uninduced & ss	7	3.1	mid right - image 17
87	MC3T3-E1	uninduced & ss	7	2.9	top mid - image 18
88	MC3T3-E1	uninduced & ss	7	2.4	right edge - image 18
89	MC3T3-E1	uninduced & ss	7	2.8	right edge mid - image 18
90	MC3T3-E1	uninduced & ss	7	2.6	below no. 90 - image 18
91	MC3T3-E1	uninduced & ss	7	2.9	left mid - image 18
92	MC3T3-E1	uninduced & ss	7	3	below no. 92 - image 18
93	MC3T3-E1	uninduced & ss	7	3.5	upper mid - image 19
94	MC3T3-E1	uninduced & ss	7	3.5	left mid - image 19
95	MC3T3-E1	uninduced & ss	7	3.5	left of no. 95 - image 19
96	MC3T3-E1	uninduced & ss	7	3.3	mid bottom - image 19
97	MC3T3-E1	uninduced & ss	7	3.7	right lower mid - image 19
98	MC3T3-E1	uninduced & ss	7	3	right mid upper - image 20
99	MC3T3-E1	uninduced & ss	7	3.6	mid lower left - image 20
100	MC3T3-E1	uninduced & ss	7	4.4	left bottom corner - image 20
101	MC3T3-E1	uninduced & ss	7	4.5	left top corner - image 20
102	MC3T3-E1	uninduced & ss	7	3.8	mid - image 21	set 3
103	MC3T3-E1	uninduced & ss	7	3	above no. 103 - image 21
104	MC3T3-E1	uninduced & ss	7	3.5	left upper corner - image 21
105	MC3T3-E1	uninduced & ss	7	3.3	left mid - image 21
106	MC3T3-E1	uninduced & ss	7	3.7	left bottom edge - image 21
107	MC3T3-E1	uninduced & ss	7	3.4	right top corner - image 21
108	MC3T3-E1	uninduced & ss	7	2.7	right of no. 108 - image 21
109	MC3T3-E1	uninduced & ss	7	3.4	right mid edge - image 21
110	MC3T3-E1	uninduced & ss	7	2.7	right bottom corner - image 21
111	MC3T3-E1	uninduced & ss	7	5.2	mid - image 22
112	MC3T3-E1	uninduced & ss	7	3.9	rightish below no. 112 - image 22
113	MC3T3-E1	uninduced & ss	7	4.5	left top corner - image 22
114	MC3T3-E1	uninduced & ss	7	4	right mid - image 22
115	MC3T3-E1	uninduced & ss	7	3.8	mid - image 23
116	MC3T3-E1	uninduced & ss	7	4.4	leftish mid lower - image 23
117	MC3T3-E1	uninduced & ss	7	2.8	left bottom corner - image 23
118	MC3T3-E1	uninduced & ss	7	3.8	left top corner - image 23
119	MC3T3-E1	uninduced & ss	7	3	below no. 119 - image 23
120	MC3T3-E1	uninduced & ss	7	3.6	right mid - image 23
121	MC3T3-E1	uninduced & ss	7	2.5	right top - image 23
122	MC3T3-E1	uninduced & ss	7	4.2	mid - image 24
123	MC3T3-E1	uninduced & ss	7	3.4	right mid - image 24
124	MC3T3-E1	uninduced & ss	7	3.1	left top - image 24a
125	MC3T3-E1	uninduced & ss	7	3.2	rightish mid bottom - image 25
126	MC3T3-E1	uninduced & ss	7	3.3	right lower - image 25
127	MC3T3-E1	uninduced & ss	7	3	left mid - image 25
128	MC3T3-E1	uninduced & ss	7	3.2	left top - image 25
129	MC3T3-E1	uninduced & ss	7	2.7	right top - image 26
130	MC3T3-E1	uninduced & ss	7	3.3	right top edge - image 26
131	MC3T3-E1	uninduced & ss	7	3.3	left upper mid - image 26
132	MC3T3-E1	uninduced & ss	7	2.9	left mid edge - image 26
133	MC3T3-E1	uninduced & ss	7	3.7	top mid edge - image 27
134	MC3T3-E1	uninduced & ss	7	3	right lower - image 27
135	MC3T3-E1	uninduced & ss	7	3.4	mid lower - image 28
136	MC3T3-E1	uninduced & ss	7	3.5	left bottom - image 28
137	MC3T3-E1	uninduced & ss	7	2.8	left upper pair - image 28
138	MC3T3-E1	uninduced & ss	7	3	left upper pair - image 28
139	MC3T3-E1	uninduced & ss	7	3.7	mid rightish upper - image 28
140	MC3T3-E1	uninduced & ss	7	3.8	right of no. 140 - image 28
141	MC3T3-E1	uninduced & ss	7	3.7	mid lower - image 29
142	MC3T3-E1	uninduced & ss	7	3.4	left top - image 29
143	MC3T3-E1	uninduced & ss	7	3	left upper edge - image 29
144	MC3T3-E1	uninduced & ss	7	2.7	right upper - image 29
145	MC3T3-E1	uninduced & ss	7	3.3	mid lower - image 30
146	MC3T3-E1	uninduced & ss	7	2.7	left lower - image 30
147	MC3T3-E1	uninduced & ss	7	3.7	left mid - image 30
148	MC3T3-E1	uninduced & ss	7	3.6	mid upper - image 30
149	MC3T3-E1	uninduced & ss	7	4.3	right lower - image 30
150	MC3T3-E1	uninduced & ss	7	3.2	right upper edge - image 30
151	MC3T3-E1	uninduced & ss	7	3.3	right mid - image 31
152	MC3T3-E1	uninduced & ss	7	3.3	leftish mid upper - image 31
153	MC3T3-E1	uninduced & ss	7	4.2	left mid edge - image 31
154	MC3T3-E1	uninduced & ss	7	2.7	mid bottom - image 31
Sl no.	Cell line	Treatment type	Day	Cilia length	Comments
1	MC3T3-E1	OS & ss	7	4.1	middle - image 1	set 1
2	MC3T3-E1	OS & ss	7	3.19	middle right - image 1
3	MC3T3-E1	OS & ss	7	2.7	middle left - image 1
4	MC3T3-E1	OS & ss	7	2.97	bottom right - image 1
5	MC3T3-E1	OS & ss	7	3.3	middle - image 2
6	MC3T3-E1	OS & ss	7	3.02	middle top - image 2
7	MC3T3-E1	OS & ss	7	3.1	right top - image 2
8	MC3T3-E1	OS & ss	7	3.25	middle - image 3
9	MC3T3-E1	OS & ss	7	2.99	right of no. 8 - image 3
10	MC3T3-E1	OS & ss	7	3.43	middle extreme right - image 3
11	MC3T3-E1	OS & ss	7	2.4	left middle - image 3
12	MC3T3-E1	OS & ss	7	2.98	middle - image 4
13	MC3T3-E1	OS & ss	7	3.7	left lower middle - image 4
14	MC3T3-E1	OS & ss	7	3.14	right lower middle - image 4
15	MC3T3-E1	OS & ss	7	2.34	lower middle - image 4
16	MC3T3-E1	OS & ss	7	3.12	right extreme middle - image 4
17	MC3T3-E1	OS & ss	7	2.88	left bottom - image 4
18	MC3T3-E1	OS & ss	7	2.84	middle - image 5
19	MC3T3-E1	OS & ss	7	3.26	right of no. 18 - image 5
20	MC3T3-E1	OS & ss	7	2.1	left middle lower - image 5
21	MC3T3-E1	OS & ss	7	2.33	extreme left middle - image 5
22	MC3T3-E1	OS & ss	7	3.45	middle - image 6
23	MC3T3-E1	OS & ss	7	2.84	right middle bottom - image 6
24	MC3T3-E1	OS & ss	7	2.79	right bottom - image 6
25	MC3T3-E1	OS & ss	7	2.45	middle right (right of no. 22) - image 6
26	MC3T3-E1	OS & ss	7	3.17	middle - image 7
27	MC3T3-E1	OS & ss	7	2.9	right middle top - image 7
28	MC3T3-E1	OS & ss	7	3.6	right top - image 7 (above no. 28)
29	MC3T3-E1	OS & ss	7	3.26	right top most - image 7 (above no. 29)
30	MC3T3-E1	OS & ss	7	2.9	right bottom - image 7
31	MC3T3-E1	OS & ss	7	2.4	left most middle - image 7
32	MC3T3-E1	OS & ss	7	2.71	left bottom - image 7
33	MC3T3-E1	OS & ss	7	3.23	middle - image 8
34	MC3T3-E1	OS & ss	7	2.6	left lower middle - image 8
35	MC3T3-E1	OS & ss	7	2.95	top rightish - image 8
36	MC3T3-E1	OS & ss	7	2.21	bottom right - image 8
37	MC3T3-E1	OS & ss	7	2.91	middle - image 9
38	MC3T3-E1	OS & ss	7	2.55	right lower middle - image 9
39	MC3T3-E1	OS & ss	7	3.34	right bottom - image 9
40	MC3T3-E1	OS & ss	7	3	left bottom (first from right) - image 9
41	MC3T3-E1	OS & ss	7	2.7	left bottom (first from left) - image 9
42	MC3T3-E1	OS & ss	7	3.6	top right - image 9
43	MC3T3-E1	OS & ss	7	3.02	middle - image 10
44	MC3T3-E1	OS & ss	7	2.48	right middle (right of no. 44) - image 10
45	MC3T3-E1	OS & ss	7	2.76	extreme right middle - image 10
46	MC3T3-E1	OS & ss	7	2.96	top middle - image 10
47	MC3T3-E1	OS & ss	7	2.61	top left - image 10
48	MC3T3-E1	OS & ss	7	3.5	mid - image 11	set 2
49	MC3T3-E1	OS & ss	7	4	mid bottom - image 11
50	MC3T3-E1	OS & ss	7	4	left upper mid - image 11
51	MC3T3-E1	OS & ss	7	3.05	left mid bottom - image 11
52	MC3T3-E1	OS & ss	7	3.7	right mid - image 11
53	MC3T3-E1	OS & ss	7	4.1	right top - image 11
54	MC3T3-E1	OS & ss	7	2.9	mid rightish - image 12
55	MC3T3-E1	OS & ss	7	5.2	right mid - image 12
56	MC3T3-E1	OS & ss	7	2.7	below no. 53 - image 12
57	MC3T3-E1	OS & ss	7	3.1	left mid - image 12
58	MC3T3-E1	OS & ss	7	3.2	left top - image 12
59	MC3T3-E1	OS & ss	7	2.4	mid - image 13
60	MC3T3-E1	OS & ss	7	3.51	left mid - image 13
61	MC3T3-E1	OS & ss	7	3.1	below no. 60 - image 13
62	MC3T3-E1	OS & ss	7	4.2	right bottom corner - image 13
63	MC3T3-E1	OS & ss	7	2.6	above no. 63 - image 13
64	MC3T3-E1	OS & ss	7	3.3	mid - image 14
65	MC3T3-E1	OS & ss	7	3.8	left top mid - image 14
66	MC3T3-E1	OS & ss	7	4.5	left corner - image 14
67	MC3T3-E1	OS & ss	7	3.3	left mid - image 14
68	MC3T3-E1	OS & ss	7	3.8	below no. 67 - image 14
69	MC3T3-E1	OS & ss	7	4	right of no. 69 - image 14
70	MC3T3-E1	OS & ss	7	3.7	right mid - image 14
71	MC3T3-E1	OS & ss	7	3.1	right extreme mid - image 14
72	MC3T3-E1	OS & ss	7	3.5	mid - image 15
73	MC3T3-E1	OS & ss	7	3	below no. 72 - image 15
74	MC3T3-E1	OS & ss	7	6.4	mid bottom - image 15
75	MC3T3-E1	OS & ss	7	3.6	right mid lower (extreme) - image 15
76	MC3T3-E1	OS & ss	7	4.1	left mid up - image 15
77	MC3T3-E1	OS & ss	7	3.1	left of no. 76 - image 15
78	MC3T3-E1	OS & ss	7	2.9	below no. 76 - image 15
79	MC3T3-E1	OS & ss	7	3.8	mid - image 16
80	MC3T3-E1	OS & ss	7	4.1	top right (bottom)- image 16
81	MC3T3-E1	OS & ss	7	3.2	top right (upper) - image 16
82	MC3T3-E1	OS & ss	7	3.4	below no. 80 - image 16
83	MC3T3-E1	OS & ss	7	3.4	below no. 82 - image 16
84	MC3T3-E1	OS & ss	7	3.9	right of no. 83 - image 16
85	MC3T3-E1	OS & ss	7	3.3	mid bottom - image 16
86	MC3T3-E1	OS & ss	7	3.2	right of no. 85 - image 16
87	MC3T3-E1	OS & ss	7	3.4	left bottom corner - image 16
88	MC3T3-E1	OS & ss	7	3	left mid - image 16
89	MC3T3-E1	OS & ss	7	4.3	mid lower - image 17
90	MC3T3-E1	OS & ss	7	4.1	right of no. 89 - image 17
91	MC3T3-E1	OS & ss	7	3.3	top mid - image 17
92	MC3T3-E1	OS & ss	7	3.1	right mid (up) - image 17
93	MC3T3-E1	OS & ss	7	3.5	right of no. 92 - image 17
94	MC3T3-E1	OS & ss	7	3.4	mid right extreme - image 17
95	MC3T3-E1	OS & ss	7	3.4	lower mid right (extreme) - image 17
96	MC3T3-E1	OS & ss	7	4	top leftish - image 17
97	MC3T3-E1	OS & ss	7	3.1	below no. 96 - image 17
98	MC3T3-E1	OS & ss	7	4.2	left mid lower - image 17
99	MC3T3-E1	OS & ss	7	4.7	mid top - image 18
100	MC3T3-E1	OS & ss	7	4.2	below no. 99 (right) - image 18
101	MC3T3-E1	OS & ss	7	3.8	bottom right - image 18
102	MC3T3-E1	OS & ss	7	4.2	mid bottom - image 18
103	MC3T3-E1	OS & ss	7	5.3	left corner bottom - image 18
104	MC3T3-E1	OS & ss	7	2.6	above no. 114 - image 18
105	MC3T3-E1	OS & ss	7	3.6	up mid left - image 18
106	MC3T3-E1	OS & ss	7	3.2	above no. 115 - image 18
107	MC3T3-E1	OS & ss	7	4	mid leftish top - image 119
108	MC3T3-E1	OS & ss	7	3.7	left of no. 117 - image 19
109	MC3T3-E1	OS & ss	7	3.2	extreme left up - image 19
110	MC3T3-E1	OS & ss	7	4.1	bottom left - image 19
111	MC3T3-E1	OS & ss	7	3.7	right of no. 120 - image 19
112	MC3T3-E1	OS & ss	7	3.6	above no. 121 - image 19
113	MC3T3-E1	OS & ss	7	3.7	right lower mid - image 19
114	MC3T3-E1	OS & ss	7	4.5	right corner - image 19
115	MC3T3-E1	OS & ss	7	3.3	extreme right lower mid - image 19
116	MC3T3-E1	OS & ss	7	4.6	mid up - image 20
117	MC3T3-E1	OS & ss	7	3.5	above no. 126 - image 20
118	MC3T3-E1	OS & ss	7	3.6	right of no. 126 - image 20
119	MC3T3-E1	OS & ss	7	3.3	right mid bottom - image 20
120	MC3T3-E1	OS & ss	7	3.9	left mid - image 20
121	MC3T3-E1	OS & ss	7	3.2	left bottom corner - image 20
122	MC3T3-E1	OS & ss	7	3.3	mid lower - image 21	set 3
123	MC3T3-E1	OS & ss	7	3.5	left bottom - image 21
124	MC3T3-E1	OS & ss	7	3.2	left mid - image 21
125	MC3T3-E1	OS & ss	7	3.6	leftish mid top - image 21
126	MC3T3-E1	OS & ss	7	3.7	right bottom pair - image 21
127	MC3T3-E1	OS & ss	7	3.5	right bottom pair - image 21
128	MC3T3-E1	OS & ss	7	3.2	mid - image 22
129	MC3T3-E1	OS & ss	7	3.3	left mid pair - image 22
130	MC3T3-E1	OS & ss	7	4.1	left mid pair - image 22
131	MC3T3-E1	OS & ss	7	3.4	rightish mid top - image 22
132	MC3T3-E1	OS & ss	7	3	leftish mid top - image 22
133	MC3T3-E1	OS & ss	7	3.5	mid - image 23
134	MC3T3-E1	OS & ss	7	2.8	rightish mid lower -image 23
135	MC3T3-E1	OS & ss	7	3.1	right lower - image 23
136	MC3T3-E1	OS & ss	7	3.1	right bottom - image 23
137	MC3T3-E1	OS & ss	7	2.7	left top corner - image 23
138	MC3T3-E1	OS & ss	7	2.8	leftish mid lower - image 23
139	MC3T3-E1	OS & ss	7	2.7	mid top - image 24
140	MC3T3-E1	OS & ss	7	2.6	left mid edge - image 24
141	MC3T3-E1	OS & ss	7	3.1	mid - image 25
142	MC3T3-E1	OS & ss	7	4	left lower mid - image 25
143	MC3T3-E1	OS & ss	7	4.1	left of no. 152 - image 25
144	MC3T3-E1	OS & ss	7	3.8	left lower edge - image 25
145	MC3T3-E1	OS & ss	7	3.2	left lower corner - image 25
146	MC3T3-E1	OS & ss	7	4	right lower corner - image 25
147	MC3T3-E1	OS & ss	7	3.2	rightish mid upper - image 25
148	MC3T3-E1	OS & ss	7	3.7	mid bottom - image 26
149	MC3T3-E1	OS & ss	7	4	left of no. 158 - image 26
150	MC3T3-E1	OS & ss	7	4.5	left bottom - image 26
151	MC3T3-E1	OS & ss	7	3.6	left mid edge - image 26
152	MC3T3-E1	OS & ss	7	3	right upper edge - image 26
153	MC3T3-E1	OS & ss	7	3.2	left mid - image 27
154	MC3T3-E1	OS & ss	7	3.6	right upper - image 27
155	MC3T3-E1	OS & ss	7	3.3	right top corner - image 27
156	MC3T3-E1	OS & ss	7	4.3	right lower pair - image 27
157	MC3T3-E1	OS & ss	7	4.4	right lower pair - image 27
158	MC3T3-E1	OS & ss	7	3	top left - image 28
159	MC3T3-E1	OS & ss	7	3	mid lower - image 28
160	MC3T3-E1	OS & ss	7	3.1	left lower - image 28
161	MC3T3-E1	OS & ss	7	4.2	right lower - image 28
162	MC3T3-E1	OS & ss	7	4	mid - image 29
163	MC3T3-E1	OS & ss	7	3	left upper - image 29
164	MC3T3-E1	OS & ss	7	4.2	right top corner - image 29
165	MC3T3-E1	OS & ss	7	2.8	right mid lower - image 29
166	MC3T3-E1	OS & ss	7	3.1	mid lower - image 29
167	MC3T3-E1	OS & ss	7	3	left mid edge - image 29
168	MC3T3-E1	OS & ss	7	3.2	mid - image 30
169	MC3T3-E1	OS & ss	7	3	mid bottom - image 30
170	MC3T3-E1	OS & ss	7	2.8	left upper - image 30
171	MC3T3-E1	OS & ss	7	2.7	left bottom - image 30
172	MC3T3-E1	OS & ss	7	2.8	right upper edge - image 30

## Sheet: MC3T3 day 14
Sl no.	Cell line	Treatment type	Day	Cilia length	Comments
1	MC3T3-E1	uninduced & ss	14	3.47	middle - image 1	set 1
2	MC3T3-E1	uninduced & ss	14	2.92	right middle top - image 1		ss: serum starved
3	MC3T3-E1	uninduced & ss	14	3	top left - image 1
4	MC3T3-E1	uninduced & ss	14	3.63	middle - image 2		pixel: 0.07206 um
5	MC3T3-E1	uninduced & ss	14	2.93	bottom middle - image 2		1 um: 13.877 pixels
6	MC3T3-E1	uninduced & ss	14	3.9	middle - image 3
7	MC3T3-E1	uninduced & ss	14	3.73	lower right - image 3
8	MC3T3-E1	uninduced & ss	14	3.33	top right - image 3
9	MC3T3-E1	uninduced & ss	14	3.37	middle - image 4
10	MC3T3-E1	uninduced & ss	14	3.48	right middle - image 4
11	MC3T3-E1	uninduced & ss	14	4.06	left bottom - image 4
12	MC3T3-E1	uninduced & ss	14	3.32	middle - image 5
13	MC3T3-E1	uninduced & ss	14	3.03	top right - image 5
14	MC3T3-E1	uninduced & ss	14	2.43	left middle - image 5
15	MC3T3-E1	uninduced & ss	14	4	middle - image 6
16	MC3T3-E1	uninduced & ss	14	3.61	top right - image 6
17	MC3T3-E1	uninduced & ss	14	3.34	middle - image 7
18	MC3T3-E1	uninduced & ss	14	4.58	middle - image 8
19	MC3T3-E1	uninduced & ss	14	3.32	left middle - image 8
20	MC3T3-E1	uninduced & ss	14	3.83	top right - image 8
21	MC3T3-E1	uninduced & ss	14	2.86	middle - image 9
22	MC3T3-E1	uninduced & ss	14	2.95	bottom left - image 9
23	MC3T3-E1	uninduced & ss	14	3.43	right of no. 21 - image 9
24	MC3T3-E1	uninduced & ss	14	3.46	middle - image 10
25	MC3T3-E1	uninduced & ss	14	2.56	top left middle - image 10
26	MC3T3-E1	uninduced & ss	14	2.4	mid - image 11	set 2
27	MC3T3-E1	uninduced & ss	14	2.3	above no. 26 - image 11
28	MC3T3-E1	uninduced & ss	14	2.9	right mid - image 11
29	MC3T3-E1	uninduced & ss	14	2.7	right edge mid - image 11
30	MC3T3-E1	uninduced & ss	14	3.4	right lower mid - image 11
31	MC3T3-E1	uninduced & ss	14	2.7	left of no. 30 - image 11
32	MC3T3-E1	uninduced & ss	14	3.7	left mid - image 11
33	MC3T3-E1	uninduced & ss	14	2.6	below no. 32 - image 11
34	MC3T3-E1	uninduced & ss	14	2.9	left of no. 32 - image 11
35	MC3T3-E1	uninduced & ss	14	2.7	left lower mid - image 11
36	MC3T3-E1	uninduced & ss	14	3.3	left lower edge - image 11
37	MC3T3-E1	uninduced & ss	14	2.7	left upper - image 11
38	MC3T3-E1	uninduced & ss	14	3.5	mid leftish - image 12
39	MC3T3-E1	uninduced & ss	14	2.8	below no. 40 - image 12
40	MC3T3-E1	uninduced & ss	14	2.8	left bottom corner - image 12
41	MC3T3-E1	uninduced & ss	14	2.8	left mid bottom - image 12
42	MC3T3-E1	uninduced & ss	14	3.1	left mid upper - image 12
43	MC3T3-E1	uninduced & ss	14	3.4	left top corner - image 12
44	MC3T3-E1	uninduced & ss	14	2.8	rightish mid - image 12
45	MC3T3-E1	uninduced & ss	14	3.9	rightish mid bottom - image 12
46	MC3T3-E1	uninduced & ss	14	3	right of no. 45 - image 12
47	MC3T3-E1	uninduced & ss	14	2.7	right mid edge - image 12
48	MC3T3-E1	uninduced & ss	14	2.9	mid right - image 13
49	MC3T3-E1	uninduced & ss	14	2.4	above no. 48 - image 13
50	MC3T3-E1	uninduced & ss	14	3.2	right mid edge - image 13
51	MC3T3-E1	uninduced & ss	14	4.5	right bottom corner - image 13
52	MC3T3-E1	uninduced & ss	14	2.7	right lower mid - image 13
53	MC3T3-E1	uninduced & ss	14	2.8	left of no. 52 - image 13
54	MC3T3-E1	uninduced & ss	14	3.6	mid upper left - image 13
55	MC3T3-E1	uninduced & ss	14	3	mid - image 13
56	MC3T3-E1	uninduced & ss	14	4.1	left mid - image 13
57	MC3T3-E1	uninduced & ss	14	4	below no. 56 - image 13
58	MC3T3-E1	uninduced & ss	14	3.7	mid - image 14
59	MC3T3-E1	uninduced & ss	14	2.7	top mid - image 14
60	MC3T3-E1	uninduced & ss	14	2.8	below no. 59 - image 14
61	MC3T3-E1	uninduced & ss	14	3.7	right bottom - image 14
62	MC3T3-E1	uninduced & ss	14	3	left bottom mid - image 14
63	MC3T3-E1	uninduced & ss	14	3.5	left bottom corner - image 14
64	MC3T3-E1	uninduced & ss	14	3.4	mid - image 15
65	MC3T3-E1	uninduced & ss	14	3.3	top right - image 15
66	MC3T3-E1	uninduced & ss	14	2.8	right of no. 65 - image 15
67	MC3T3-E1	uninduced & ss	14	3.7	right upper mid edge - image 15
68	MC3T3-E1	uninduced & ss	14	3	right of no. 67 - image 15
69	MC3T3-E1	uninduced & ss	14	4.1	right lower edge - image 15
70	MC3T3-E1	uninduced & ss	14	3.2	right bottom corner - image 15
71	MC3T3-E1	uninduced & ss	14	3.2	right mid bottom edge - image 15
72	MC3T3-E1	uninduced & ss	14	3	left upper mid - image 15
73	MC3T3-E1	uninduced & ss	14	3.6	left mid top - image 15
74	MC3T3-E1	uninduced & ss	14	3.2	left corner top - image 15
75	MC3T3-E1	uninduced & ss	14	3.4	left belowe no. 64 - image 15
76	MC3T3-E1	uninduced & ss	14	3.5	left lower edge - image 15
77	MC3T3-E1	uninduced & ss	14	2.5	mid - image 16
78	MC3T3-E1	uninduced & ss	14	2.8	right mid top - image 16
79	MC3T3-E1	uninduced & ss	14	3.2	right bottom corner - image 16
80	MC3T3-E1	uninduced & ss	14	2.4	left mid bottom - image 16
81	MC3T3-E1	uninduced & ss	14	3	left lower mid - image 16
82	MC3T3-E1	uninduced & ss	14	3.7	right mid upper - image 17
83	MC3T3-E1	uninduced & ss	14	4.1	right bottom corner - image 17
84	MC3T3-E1	uninduced & ss	14	3	right bottom mid - image 17
85	MC3T3-E1	uninduced & ss	14	2.8	left of no. 84 - image 17
86	MC3T3-E1	uninduced & ss	14	3.9	left edge mid - image 17
87	MC3T3-E1	uninduced & ss	14	2.7	left below no. 86 - image 17
88	MC3T3-E1	uninduced & ss	14	2.7	left of mid (top) - image 17
89	MC3T3-E1	uninduced & ss	14	3.3	left of no. 88 - image 17
90	MC3T3-E1	uninduced & ss	14	2.6	mid - image 18
91	MC3T3-E1	uninduced & ss	14	4.2	mid bottom - image 18
92	MC3T3-E1	uninduced & ss	14	3.4	right top - image 18
93	MC3T3-E1	uninduced & ss	14	3.3	below no. 92- image 18
94	MC3T3-E1	uninduced & ss	14	3.5	below no. 93 - image 18
95	MC3T3-E1	uninduced & ss	14	3.1	below no. 94 - image 18
96	MC3T3-E1	uninduced & ss	14	2.8	right mid edge - image 18
97	MC3T3-E1	uninduced & ss	14	2.8	left mid top - image 18
98	MC3T3-E1	uninduced & ss	14	2.9	left mid - image 18
99	MC3T3-E1	uninduced & ss	14	3	left mid edge - image 18
100	MC3T3-E1	uninduced & ss	14	3	mid - image 19
101	MC3T3-E1	uninduced & ss	14	2.9	mid right - image 19
102	MC3T3-E1	uninduced & ss	14	3.1	right of no. 101 - image 19
103	MC3T3-E1	uninduced & ss	14	3.5	right lower mid - image 19
104	MC3T3-E1	uninduced & ss	14	2.9	mid bottom - image 19
105	MC3T3-E1	uninduced & ss	14	2.8	mid left - image 19
106	MC3T3-E1	uninduced & ss	14	3.8	left mid edge (right) - image 19
107	MC3T3-E1	uninduced & ss	14	2.7	left mid edge (left) - image 19
108	MC3T3-E1	uninduced & ss	14	3.7	mid - image 20
109	MC3T3-E1	uninduced & ss	14	2.9	right mid edge - image 20
110	MC3T3-E1	uninduced & ss	14	2.9	mid top - image 20
111	MC3T3-E1	uninduced & ss	14	3.4	left mid top - image 20
112	MC3T3-E1	uninduced & ss	14	3.4	below no. 111 - image 20
113	MC3T3-E1	uninduced & ss	14	3.1	left of no. 111 - image 20
114	MC3T3-E1	uninduced & ss	14	2.4	left of no. 113 - image 20
115	MC3T3-E1	uninduced & ss	14	3.4	left bottom - image 20
116	MC3T3-E1	uninduced & ss	14	5	top right edge - image 21	set 3
117	MC3T3-E1	uninduced & ss	14	5	leftish mid lower - image 21
118	MC3T3-E1	uninduced & ss	14	5	left of no. 117 - image 21
119	MC3T3-E1	uninduced & ss	14	3.2	lower rightish mid - image 22
120	MC3T3-E1	uninduced & ss	14	2.7	top leftish mid edge - image 22
121	MC3T3-E1	uninduced & ss	14	2.8	lower left edge - image 22
122	MC3T3-E1	uninduced & ss	14	2.5	upper mid - image 22
123	MC3T3-E1	uninduced & ss	14	4.1	leftish mid - image 23
124	MC3T3-E1	uninduced & ss	14	3.1	left mid edge - image 23
125	MC3T3-E1	uninduced & ss	14	2.8	left lower corner - image 23
126	MC3T3-E1	uninduced & ss	14	3.6	rightmid edge - image 23
127	MC3T3-E1	uninduced & ss	14	3.5	mid - image 24
128	MC3T3-E1	uninduced & ss	14	3.9	above no. 127 - image 24
129	MC3T3-E1	uninduced & ss	14	4	left mid - image 24
130	MC3T3-E1	uninduced & ss	14	3.3	left lower corner - image 24
131	MC3T3-E1	uninduced & ss	14	3.5	right mid - image 24
132	MC3T3-E1	uninduced & ss	14	4.4	right lower corner - image 24
133	MC3T3-E1	uninduced & ss	14	2.7	mid - image 25
134	MC3T3-E1	uninduced & ss	14	3.3	lower leftish mid - image 25
135	MC3T3-E1	uninduced & ss	14	3	left lower corner - image 25
136	MC3T3-E1	uninduced & ss	14	3.3	left mid edge - image 25
137	MC3T3-E1	uninduced & ss	14	3.2	rightish mid top edge - image 26
138	MC3T3-E1	uninduced & ss	14	3.4	right of no. 137 - image 26
139	MC3T3-E1	uninduced & ss	14	3.1	lower right edge - image 26
140	MC3T3-E1	uninduced & ss	14	4.1	leftish mid top edge - image 26
141	MC3T3-E1	uninduced & ss	14	4.4	left bottom edge - image 26
142	MC3T3-E1	uninduced & ss	14	4.6	upper right mid - image 27
143	MC3T3-E1	uninduced & ss	14	4.4	upper right mid - image 27
144	MC3T3-E1	uninduced & ss	14	3.3	mid upper - image 28
145	MC3T3-E1	uninduced & ss	14	2.7	lower mid - image 28
146	MC3T3-E1	uninduced & ss	14	3.4	leftish mid bottom - image 28
147	MC3T3-E1	uninduced & ss	14	2.8	right bottom corner - image 28
148	MC3T3-E1	uninduced & ss	14	3.4	mid upper - image 29
149	MC3T3-E1	uninduced & ss	14	3.6	rightish mid - image 29
150	MC3T3-E1	uninduced & ss	14	2.6	above no. 149 - image 29
151	MC3T3-E1	uninduced & ss	14	3.3	mid - image 30
152	MC3T3-E1	uninduced & ss	14	3.7	right lower corner - image 30
153	MC3T3-E1	uninduced & ss	14	2.8	right mid - image 30
154	MC3T3-E1	uninduced & ss	14	2.7	left mid - image 30
155	MC3T3-E1	uninduced & ss	14	2.8	right top edge - image 30
Sl no.	Cell line	Treatment type	Day	Cilia length	Comments
1	MC3T3-E1	OS & ss	14	4.83	middle - image 1
2	MC3T3-E1	OS & ss	14	3.24	middle - image 2
3	MC3T3-E1	OS & ss	14	5.42	lower bottom - image 2
4	MC3T3-E1	OS & ss	14	5.16	middle - image 3
5	MC3T3-E1	OS & ss	14	3.34	top middle left - image 3
6	MC3T3-E1	OS & ss	14	3.12	left of no. 5 - image 3
7	MC3T3-E1	OS & ss	14	2.58	bottom most left - image 3
8	MC3T3-E1	OS & ss	14	3.71	above no. 4 (right) - image 3
9	MC3T3-E1	OS & ss	14	3.31	middle - image 4
10	MC3T3-E1	OS & ss	14	2.52	left middle - image 4
11	MC3T3-E1	OS & ss	14	2.99	extreme right middle - image 4
12	MC3T3-E1	OS & ss	14	3.27	middle - image 5
13	MC3T3-E1	OS & ss	14	3.2	right of no. 12 - image 5
14	MC3T3-E1	OS & ss	14	4.78	bottom right - image 5
15	MC3T3-E1	OS & ss	14	5.72	left bottom - image 5
16	MC3T3-E1	OS & ss	14	5.76	middle - image 6
17	MC3T3-E1	OS & ss	14	3.27	top right - image 6
18	MC3T3-E1	OS & ss	14	3.34	right bottom - image 6
19	MC3T3-E1	OS & ss	14	3.93	middle - image 7
20	MC3T3-E1	OS & ss	14	2.81	top left of no. 19 - image 7
21	MC3T3-E1	OS & ss	14	2.44	bottom right - image 7
22	MC3T3-E1	OS & ss	14	3.87	middle - image 8
23	MC3T3-E1	OS & ss	14	2.79	below no. 22 - image 8
24	MC3T3-E1	OS & ss	14	2.71	above no. 22 on right - image 8
25	MC3T3-E1	OS & ss	14	2.58	middle - image 9
26	MC3T3-E1	OS & ss	14	4.1	lower middle left - image 9
27	MC3T3-E1	OS & ss	14	3.3	top most middle - image 9
28	MC3T3-E1	OS & ss	14	3.41	bottom right - image 9
29	MC3T3-E1	OS & ss	14	4.46	middle - image 10
30	MC3T3-E1	OS & ss	14	3.3	top middle - image 10
31	MC3T3-E1	OS & ss	14	3.52	middle right - image 10
32	MC3T3-E1	OS & ss	14	3.45	lower middle left - image 10
33	MC3T3-E1	OS & ss	14	4.5	left mid upper - image 11	set 2
34	MC3T3-E1	OS & ss	14	4.5	left top corner - image 11
35	MC3T3-E1	OS & ss	14	3.9	mid top - image 11
36	MC3T3-E1	OS & ss	14	3.7	left mid edge - image 11
37	MC3T3-E1	OS & ss	14	2.8	below no. 36 - image 11
38	MC3T3-E1	OS & ss	14	3.9	below no. 37 - image 11
39	MC3T3-E1	OS & ss	14	3.8	right top edge - image 11
40	MC3T3-E1	OS & ss	14	3	mid right edge - image 11
41	MC3T3-E1	OS & ss	14	4	top mid - image 11
42	MC3T3-E1	OS & ss	14	3.2	mid (right) - image 12
43	MC3T3-E1	OS & ss	14	3.3	mid (mid) - image 12
44	MC3T3-E1	OS & ss	14	3.2	mid (left) - image 12
45	MC3T3-E1	OS & ss	14	4.2	mid bottom - image 12
46	MC3T3-E1	OS & ss	14	3.3	right of no. 45 - image 12
47	MC3T3-E1	OS & ss	14	3.3	right of no. 46 - image 12
48	MC3T3-E1	OS & ss	14	3.2	right bottom corner - image 12
49	MC3T3-E1	OS & ss	14	3.3	right mid - image 12
50	MC3T3-E1	OS & ss	14	3.9	right mid edge - image 12
51	MC3T3-E1	OS & ss	14	4.9	bottom leftish - image 12
52	MC3T3-E1	OS & ss	14	4.2	left bottom corner - image 12
53	MC3T3-E1	OS & ss	14	3.1	mid - image 13
54	MC3T3-E1	OS & ss	14	5.8	right mid - image 13
55	MC3T3-E1	OS & ss	14	4.1	right mid edge (upper) - image 13
56	MC3T3-E1	OS & ss	14	3.8	mid top - image 13
57	MC3T3-E1	OS & ss	14	3.2	right top corner - image 13
58	MC3T3-E1	OS & ss	14	4.1	right bottom - image 13
59	MC3T3-E1	OS & ss	14	3.6	left mid - image 13
60	MC3T3-E1	OS & ss	14	3.3	left lower mid - image 13
61	MC3T3-E1	OS & ss	14	4.5	below no. 59 - image 13
62	MC3T3-E1	OS & ss	14	3.5	left mid edge - image 13
63	MC3T3-E1	OS & ss	14	5.2	left of no. 62 - image 13
64	MC3T3-E1	OS & ss	14	5.1	top left corner - image 13
65	MC3T3-E1	OS & ss	14	6.5	mid bottom - image 14
66	MC3T3-E1	OS & ss	14	4.7	right of no. 65 - image 14
67	MC3T3-E1	OS & ss	14	4.5	right mid - image 14
68	MC3T3-E1	OS & ss	14	4.5	top right edge - image 14
69	MC3T3-E1	OS & ss	14	4	bottom right edge - image 14
70	MC3T3-E1	OS & ss	14	5.5	left lower mid - image 14
71	MC3T3-E1	OS & ss	14	3.1	below no. 70 - image 14
72	MC3T3-E1	OS & ss	14	3	below no. 71 - image 14
73	MC3T3-E1	OS & ss	14	3.8	left lower of no. 70 (left) - image 14
74	MC3T3-E1	OS & ss	14	3.4	left lower of no. 70 (mid) - image 14
75	MC3T3-E1	OS & ss	14	4	Left mid - image 14
76	MC3T3-E1	OS & ss	14	3.4	above no. 75 - image 14
77	MC3T3-E1	OS & ss	14	3.4	above no. 76. - image 14
78	MC3T3-E1	OS & ss	14	4.5	top left - image 14
79	MC3T3-E1	OS & ss	14	4.8	left of no. 73 - image 14
80	MC3T3-E1	OS & ss	14	3.5	left mid edge - image 14
81	MC3T3-E1	OS & ss	14	4.9	mid bottom - image 15
82	MC3T3-E1	OS & ss	14	4.4	above no. 81 - image 15
83	MC3T3-E1	OS & ss	14	4	left of no. 82 - image 15
84	MC3T3-E1	OS & ss	14	3.5	below no. 84 - image 15
85	MC3T3-E1	OS & ss	14	4	left mid edge - image 15
86	MC3T3-E1	OS & ss	14	4.1	left top corner - image 15
87	MC3T3-E1	OS & ss	14	3.6	above no. 87 - image 15
88	MC3T3-E1	OS & ss	14	3.9	top leftish mid - image 15
89	MC3T3-E1	OS & ss	14	3.7	right mid - image 15
90	MC3T3-E1	OS & ss	14	3.9	right lower of no. 90 - image 15
91	MC3T3-E1	OS & ss	14	2.9	mid right - image 16
92	MC3T3-E1	OS & ss	14	4	below no. 92 - image 16
93	MC3T3-E1	OS & ss	14	3.4	mid bottom - image 16
94	MC3T3-E1	OS & ss	14	3.5	mid right - image 16
95	MC3T3-E1	OS & ss	14	3.9	top right edge - image 16
96	MC3T3-E1	OS & ss	14	3.5	left lower mid - image 16
97	MC3T3-E1	OS & ss	14	3.4	below left of no. 97 - image 16
98	MC3T3-E1	OS & ss	14	3.9	left of no. 98 - image 16
99	MC3T3-E1	OS & ss	14	2.8	upper left mid - image 16
100	MC3T3-E1	OS & ss	14	3.4	right top corner - image 17
101	MC3T3-E1	OS & ss	14	4.1	right top edge - image 17
102	MC3T3-E1	OS & ss	14	4.4	right top mid - image 17
103	MC3T3-E1	OS & ss	14	3.2	below no. 104 - image 17
104	MC3T3-E1	OS & ss	14	3.1	right of no. 105 - image 17
105	MC3T3-E1	OS & ss	14	3.5	right bottom corner - image 17
106	MC3T3-E1	OS & ss	14	3.4	left mid edge - image 17
107	MC3T3-E1	OS & ss	14	4.1	top leftish mid - image 17
108	MC3T3-E1	OS & ss	14	3.6	top left corner - image 17
109	MC3T3-E1	OS & ss	14	3.2	mid - image 18
110	MC3T3-E1	OS & ss	14	3.1	right of no. 111 - image 18
111	MC3T3-E1	OS & ss	14	4.1	right mid - image 18
112	MC3T3-E1	OS & ss	14	3.1	right of no. 113 - image 18
113	MC3T3-E1	OS & ss	14	3.7	right lower edge - image 18
114	MC3T3-E1	OS & ss	14	6	mid bottom rightish - image 18
115	MC3T3-E1	OS & ss	14	3.9	left lower mid - image 18
116	MC3T3-E1	OS & ss	14	3.4	left bottom - image 18
117	MC3T3-E1	OS & ss	14	3.7	left mid edge - image 18
118	MC3T3-E1	OS & ss	14	3.2	left top corner - image 18
119	MC3T3-E1	OS & ss	14	5	mid - image 19
120	MC3T3-E1	OS & ss	14	3.6	right of no. 121 - image 19
121	MC3T3-E1	OS & ss	14	3.5	right top mid - image 19
122	MC3T3-E1	OS & ss	14	4.1	right top edge - image 19
123	MC3T3-E1	OS & ss	14	5.3	right mid edge - image 19
124	MC3T3-E1	OS & ss	14	6.4	right bottom edge - image 19
125	MC3T3-E1	OS & ss	14	4.6	left of no. 126 - image 19
126	MC3T3-E1	OS & ss	14	3.6	mid bottom - image 19
127	MC3T3-E1	OS & ss	14	4.2	above no. 128 - image 19
128	MC3T3-E1	OS & ss	14	4	left edge lower - image 19
129	MC3T3-E1	OS & ss	14	4	left top corner (right) - image 20
130	MC3T3-E1	OS & ss	14	3.9	left top corner (mid) - image 20
131	MC3T3-E1	OS & ss	14	4.9	left mid top - image 20
132	MC3T3-E1	OS & ss	14	4	left mid bottom - image 20
133	MC3T3-E1	OS & ss	14	4.4	mid - image 20
134	MC3T3-E1	OS & ss	14	3.4	right lower edge - image 20
135	MC3T3-E1	OS & ss	14	4.5	top left corner - image 20
136	MC3T3-E1	OS & ss	14	3.7	mid - image 21	set 3
137	MC3T3-E1	OS & ss	14	3.1	left upper mid - image 21
138	MC3T3-E1	OS & ss	14	3.5	above no. 138 - image 21
139	MC3T3-E1	OS & ss	14	3.3	left mid - image 21
140	MC3T3-E1	OS & ss	14	5	below no. 141 - image 21
141	MC3T3-E1	OS & ss	14	5	left lower corner - image 21
142	MC3T3-E1	OS & ss	14	4	rightish upper mid - image 21
143	MC3T3-E1	OS & ss	14	3.6	right lower corner - image 21
144	MC3T3-E1	OS & ss	14	5.2	mid - image 23
145	MC3T3-E1	OS & ss	14	4.2	mid top edge - image 23
146	MC3T3-E1	OS & ss	14	3.8	upper mid - image 24
147	MC3T3-E1	OS & ss	14	4.5	upper mid left - image 24
148	MC3T3-E1	OS & ss	14	3.3	mid left - image 24
149	MC3T3-E1	OS & ss	14	4.1	right mid upper - image 24
150	MC3T3-E1	OS & ss	14	4.1	right mid - image 25
151	MC3T3-E1	OS & ss	14	4.1	left bottom edge - image 25
152	MC3T3-E1	OS & ss	14	4.7	mid top - image 26
153	MC3T3-E1	OS & ss	14	4.2	right mid edge - image 26
154	MC3T3-E1	OS & ss	14	3.3	right mid edge - image 26
155	MC3T3-E1	OS & ss	14	4.3	rightish mid bottom - image 26
156	MC3T3-E1	OS & ss	14	3.9	rightish mid bottom - image 26
157	MC3T3-E1	OS & ss	14	4.5	left lower corner - image 26
158	MC3T3-E1	OS & ss	14	3.8	above no. 159 - image 26
159	MC3T3-E1	OS & ss	14	3.5	mid lower - image 26
160	MC3T3-E1	OS & ss	14	4.7	lower mid - image 27
161	MC3T3-E1	OS & ss	14	4.1	leftish upper mid - image 27
162	MC3T3-E1	OS & ss	14	4	left mid bottom edge - image 27
163	MC3T3-E1	OS & ss	14	3.9	right lower edge - image 27
164	MC3T3-E1	OS & ss	14	5.1	upper mid - image 28
165	MC3T3-E1	OS & ss	14	5	upper left edge - image 29
166	MC3T3-E1	OS & ss	14	3.5	upper mid left edge - image 29
167	MC3T3-E1	OS & ss	14	4.7	left lower - image 29
168	MC3T3-E1	OS & ss	14	4.6	left lower edge - image 29
169	MC3T3-E1	OS & ss	14	3.9	right lower edge - image 29
170	MC3T3-E1	OS & ss	14	3.6	rightish mid lower - image 29
171	MC3T3-E1	OS & ss	14	4.9	upper right mid - image 29
172	MC3T3-E1	OS & ss	14	4.3	mid upper - image 30
173	MC3T3-E1	OS & ss	14	5.2	left mid - image 30
174	MC3T3-E1	OS & ss	14	3.9	top left corner - image 30
175	MC3T3-E1	OS & ss	14	4.4	right of no. 173 - image 30
176	MC3T3-E1	OS & ss	14	4.6	left mid bottom edge - image 30
177	MC3T3-E1	OS & ss	14	3.5	right mid - image 30
178	MC3T3-E1	OS & ss	14	5	below no. 179 - image 30

## Sheet: MC3T3 day 21
Sl no.	Cell line	Treatment type	Day	Cilia length	Comments
1	MC3T3-E1	uninduced & ss	21	3.18	middle - image 1	set 1	ss: serum starved
2	MC3T3-E1	uninduced & ss	21	4.1	image 2
3	MC3T3-E1	uninduced & ss	21	2.79	middle - image 3		pixel: 0.07206 um
4	MC3T3-E1	uninduced & ss	21	2.79	middle - image 4		1 um: 13.877 pixels
5	MC3T3-E1	uninduced & ss	21	4.63	middle - image 5
6	MC3T3-E1	uninduced & ss	21	2.31	top middle - image 5
7	MC3T3-E1	uninduced & ss	21	3.4	middle - image 6
8	MC3T3-E1	uninduced & ss	21	2.9	lower left bottom - image 6
9	MC3T3-E1	uninduced & ss	21	3.2	right middle - image 6
10	MC3T3-E1	uninduced & ss	21	3.1	middle - image 7
11	MC3T3-E1	uninduced & ss	21	3	middle - image 8
12	MC3T3-E1	uninduced & ss	21	2.58	lower left bottom - image 8
13	MC3T3-E1	uninduced & ss	21	2.54	left of no. 11 - image 8
14	MC3T3-E1	uninduced & ss	21	3.63	top left - image 8
15	MC3T3-E1	uninduced & ss	21	2.84	top middle - image 8
16	MC3T3-E1	uninduced & ss	21	2.73	right middle (1st one) - image 8
17	MC3T3-E1	uninduced & ss	21	2.8	middle - image 9
18	MC3T3-E1	uninduced & ss	21	3.1	mid bottom - image 9
19	MC3T3-E1	uninduced & ss	21	2.77	right middle - image 9
20	MC3T3-E1	uninduced & ss	21	2.38	left middle - image 9
21	MC3T3-E1	uninduced & ss	21	3.56	left top (above no. 20) - image 9
22	MC3T3-E1	uninduced & ss	21	2.83	middle - image 10
23	MC3T3-E1	uninduced & ss	21	2.52	mid bottom - image 10
24	MC3T3-E1	uninduced & ss	21	3.04	right of no. 23 - image 10
25	MC3T3-E1	uninduced & ss	21	2.89	right middle - image 10
26	MC3T3-E1	uninduced & ss	21	2.43	left middle - image 10
27	MC3T3-E1	uninduced & ss	21	2.93	top left - image 10
28	MC3T3-E1	uninduced & ss	21	3.1	left mid - image 11	set 2
29	MC3T3-E1	uninduced & ss	21	2.4	mid lower - image 11
30	MC3T3-E1	uninduced & ss	21	2.9	mid right - image 11
31	MC3T3-E1	uninduced & ss	21	2.6	leftish mid - image 12
32	MC3T3-E1	uninduced & ss	21	3.1	below no. 31 - image 12
33	MC3T3-E1	uninduced & ss	21	2.6	left mid edge - image 12
34	MC3T3-E1	uninduced & ss	21	2.5	top left corner - image 12a
35	MC3T3-E1	uninduced & ss	21	3.3	mid upper - image 13
36	MC3T3-E1	uninduced & ss	21	2.4	left upper edge - image 13
37	MC3T3-E1	uninduced & ss	21	2.7	left lower edge - image 13
38	MC3T3-E1	uninduced & ss	21	2.9	below no. 37 - image 13
39	MC3T3-E1	uninduced & ss	21	3.4	right mid - image 13
40	MC3T3-E1	uninduced & ss	21	2.4	right mid edge - image 13
41	MC3T3-E1	uninduced & ss	21	2.6	right mid - image 14
42	MC3T3-E1	uninduced & ss	21	2.9	right lower edge - image 14
43	MC3T3-E1	uninduced & ss	21	2.3	leftish mid lower - image 14
44	MC3T3-E1	uninduced & ss	21	2.1	mid - image 14
45	MC3T3-E1	uninduced & ss	21	2.9	left lower mid - image 15
46	MC3T3-E1	uninduced & ss	21	2.7	left mid - image 15
47	MC3T3-E1	uninduced & ss	21	2.5	right upper edge - image 15
48	MC3T3-E1	uninduced & ss	21	3.2	right mid - image 16
49	MC3T3-E1	uninduced & ss	21	2.9	rightish mid lower - image 16
50	MC3T3-E1	uninduced & ss	21	3	mid - image 17
51	MC3T3-E1	uninduced & ss	21	2.2	left lower - image 17
52	MC3T3-E1	uninduced & ss	21	2.2	upper right edge - image 17
53	MC3T3-E1	uninduced & ss	21	2.7	left mid - image 18
54	MC3T3-E1	uninduced & ss	21	2.8	left upper - image 18
55	MC3T3-E1	uninduced & ss	21	2.2	left bottom edge pair - image 18
56	MC3T3-E1	uninduced & ss	21	2.2	left bottom edge pair - image 18
57	MC3T3-E1	uninduced & ss	21	3	right bottom edge - image 18
58	MC3T3-E1	uninduced & ss	21	3.3	right mid - image 19
59	MC3T3-E1	uninduced & ss	21	2.5	upper right edge - image 19
60	MC3T3-E1	uninduced & ss	21	2.6	left mid - image 19
61	MC3T3-E1	uninduced & ss	21	2.2	leftish mid lower pair - image 19
62	MC3T3-E1	uninduced & ss	21	2.2	leftish mid lower pair - image 19
63	MC3T3-E1	uninduced & ss	21	2.6	mid lower - image 20
64	MC3T3-E1	uninduced & ss	21	2.9	left upper edge - image 20
65	MC3T3-E1	uninduced & ss	21	2.6	right mid - image 20
66	MC3T3-E1	uninduced & ss	21	2.6	right mid edge - image 20
67	MC3T3-E1	uninduced & ss	21	2.8	mid lower - image 21
68	MC3T3-E1	uninduced & ss	21	2.7	left lower - image 21
69	MC3T3-E1	uninduced & ss	21	2.9	top left corner - image 21
70	MC3T3-E1	uninduced & ss	21	2.8	left bottom corner - image 22
71	MC3T3-E1	uninduced & ss	21	2.5	left upper corner - image 22
72	MC3T3-E1	uninduced & ss	21	2.8	right upper - image 22
73	MC3T3-E1	uninduced & ss	21	2.8	above no. 72 - image 22
74	MC3T3-E1	uninduced & ss	21	2.2	mid lower - image 23	set 3
75	MC3T3-E1	uninduced & ss	21	2.5	right upper mid - image 23
76	MC3T3-E1	uninduced & ss	21	1.9	right edge mid - image 23
77	MC3T3-E1	uninduced & ss	21	3.4	mid - image 24
78	MC3T3-E1	uninduced & ss	21	3.1	mid lower - image 24
79	MC3T3-E1	uninduced & ss	21	3	left upper pair - image 24
80	MC3T3-E1	uninduced & ss	21	2.8	left upper pair - image 24
81	MC3T3-E1	uninduced & ss	21	2.8	mid - image 25
82	MC3T3-E1	uninduced & ss	21	2.3	upper left - image 25
83	MC3T3-E1	uninduced & ss	21	2.7	mid leftish - image 26
84	MC3T3-E1	uninduced & ss	21	2.4	mid bottom - image 26
85	MC3T3-E1	uninduced & ss	21	2.4	left upper - image 26
86	MC3T3-E1	uninduced & ss	21	2.2	lower right - image 26
87	MC3T3-E1	uninduced & ss	21	2.2	mid - image 27
88	MC3T3-E1	uninduced & ss	21	2.5	upper left pair - image 27
89	MC3T3-E1	uninduced & ss	21	2.3	upper left pair - image 27
90	MC3T3-E1	uninduced & ss	21	2.4	upper mid - image 28
91	MC3T3-E1	uninduced & ss	21	2.2	right lower - image 28
92	MC3T3-E1	uninduced & ss	21	1.9	mid lower pair - image 28
93	MC3T3-E1	uninduced & ss	21	1.8	mid lower pair - image 28
94	MC3T3-E1	uninduced & ss	21	2	left lower bottom - image 28
95	MC3T3-E1	uninduced & ss	21	3.1	right lower - image 29
96	MC3T3-E1	uninduced & ss	21	2.2	below no. 95 - image 29
97	MC3T3-E1	uninduced & ss	21	2.5	upper left - image 29
98	MC3T3-E1	uninduced & ss	21	1.8	mid - image 30
99	MC3T3-E1	uninduced & ss	21	2	right upper - image 30
100	MC3T3-E1	uninduced & ss	21	2.2	above no. 99 - image 30
101	MC3T3-E1	uninduced & ss	21	2.2	mid left - image 30
102	MC3T3-E1	uninduced & ss	21	2.3	left of no. 101 - image 30
103	MC3T3-E1	uninduced & ss	21	2.8	left upper edge - image 30
104	MC3T3-E1	uninduced & ss	21	2.2	left of no. 102 - image 30
105	MC3T3-E1	uninduced & ss	21	2.4	mid lower - image 31
106	MC3T3-E1	uninduced & ss	21	2.9	mid upper - image 31
107	MC3T3-E1	uninduced & ss	21	2.6	left mid - image 31
108	MC3T3-E1	uninduced & ss	21	2.3	right upper - image 31
109	MC3T3-E1	uninduced & ss	21	2.6	upper leftish mid - image 32
110	MC3T3-E1	uninduced & ss	21	2.5	leftish mid - image 32
111	MC3T3-E1	uninduced & ss	21	2.3	right mid - image 32
112	MC3T3-E1	uninduced & ss	21	2.1	right edge lower - image 32
113	MC3T3-E1	uninduced & ss	21	2.5	mid upper - image 33
114	MC3T3-E1	uninduced & ss	21	2.6	left upper edge - image 33
115	MC3T3-E1	uninduced & ss	21	2.7	right edge - image 33
116	MC3T3-E1	uninduced & ss	21	2.3	right bottom corner - image 33
117	MC3T3-E1	uninduced & ss	21	2.7	right bottom - left of no. 116 - image 33
118	MC3T3-E1	uninduced & ss	21	2.6	mid lower - image 34
119	MC3T3-E1	uninduced & ss	21	2.6	left upper - image 34
120	MC3T3-E1	uninduced & ss	21	2.6	right bottom corner - image 34
121	MC3T3-E1	uninduced & ss	21	2.3	left bottom corner - image 34
122	MC3T3-E1	uninduced & ss	21	3	mid lower - image 35
123	MC3T3-E1	uninduced & ss	21	2.8	left lower - image 35
124	MC3T3-E1	uninduced & ss	21	2.3	left mid upper - image 35
125	MC3T3-E1	uninduced & ss	21	2.3	rightish mid lower - image 35
126	MC3T3-E1	uninduced & ss	21	2.4	right mid - image 35
127	MC3T3-E1	uninduced & ss	21	2.8	right mid edge - image 35
128	MC3T3-E1	uninduced & ss	21	2.5	left mid - image 36
129	MC3T3-E1	uninduced & ss	21	2.4	left bottom - image 36
130	MC3T3-E1	uninduced & ss	21	3.3	mid top - image 36
131	MC3T3-E1	uninduced & ss	21	2.3	top right edge - image 36
132	MC3T3-E1	uninduced & ss	21	2.9	leftish mid - image 37
133	MC3T3-E1	uninduced & ss	21	2.5	left mid - image 37
134	MC3T3-E1	uninduced & ss	21	2.1	rightish mid - image 37
135	MC3T3-E1	uninduced & ss	21	2.8	mid upper - image 38
136	MC3T3-E1	uninduced & ss	21	2.5	left upper - image 38
137	MC3T3-E1	uninduced & ss	21	2.4	mid lower pair - image 38
138	MC3T3-E1	uninduced & ss	21	2.3	mid lower pair - image 38
139	MC3T3-E1	uninduced & ss	21	2.7	left bottom corner - image 39
140	MC3T3-E1	uninduced & ss	21	3	mid upper - image 39
141	MC3T3-E1	uninduced & ss	21	2.6	right bottom edge - image 39
Sl no.	Cell line	Treatment type	Day	Cilia length	Comments
1	MC3T3-E1	OS & ss	21	3.4	middle - image 1	set 1
2	MC3T3-E1	OS & ss	21	2.58	right bottom - image 1
3	MC3T3-E1	OS & ss	21	3.16	middle - image 2
4	MC3T3-E1	OS & ss	21	2.79	left middle - image 2
5	MC3T3-E1	OS & ss	21	3.02	middle - image 3
6	MC3T3-E1	OS & ss	21	2.71	left middle - image 3
7	MC3T3-E1	OS & ss	21	2.49	middle - image 4
8	MC3T3-E1	OS & ss	21	2.34	left bottom - image 4
9	MC3T3-E1	OS & ss	21	2.58	middle - image 5
10	MC3T3-E1	OS & ss	21	2.41	left top middle - image 5
11	MC3T3-E1	OS & ss	21	3.05	right top - image 5
12	MC3T3-E1	OS & ss	21	2.73	middle - image 6
13	MC3T3-E1	OS & ss	21	3.89	middle - image 7
14	MC3T3-E1	OS & ss	21	2.48	right lower mid - image 7
15	MC3T3-E1	OS & ss	21	2.86	bottom middle - image 7
16	MC3T3-E1	OS & ss	21	3.15	middle - image 8
17	MC3T3-E1	OS & ss	21	2.78	left middle - image 8
18	MC3T3-E1	OS & ss	21	2.7	top left (above no. 17) - image 8
19	MC3T3-E1	OS & ss	21	2.64	bottom right - image 8
20	MC3T3-E1	OS & ss	21	2.77	middle - image 9
21	MC3T3-E1	OS & ss	21	3	bottom left - image 9
22	MC3T3-E1	OS & ss	21	2.83	middle - image 10
23	MC3T3-E1	OS & ss	21	2.85	lower left - image 10
24	MC3T3-E1	OS & ss	21	2.3	middle bottom - image 10
25	MC3T3-E1	OS & ss	21	3.5	leftish mid - image 11
26	MC3T3-E1	OS & ss	21	3.6	left upper - image 11
27	MC3T3-E1	OS & ss	21	2.8	above no. 26 - image 11
28	MC3T3-E1	OS & ss	21	3.4	left lower - image 12
29	MC3T3-E1	OS & ss	21	2.6	leftish mid - image 12
30	MC3T3-E1	OS & ss	21	3.1	mid - image 13
31	MC3T3-E1	OS & ss	21	4.7	below no. 30 - image 13	set 2
32	MC3T3-E1	OS & ss	21	3.4	left bottom edge - image 13
33	MC3T3-E1	OS & ss	21	3.6	right mid - image 13
34	MC3T3-E1	OS & ss	21	2.8	mid lower - image 14
35	MC3T3-E1	OS & ss	21	2.9	rightish mid - image 14
36	MC3T3-E1	OS & ss	21	3	mid - image 14
37	MC3T3-E1	OS & ss	21	3.2	left mid - image 14
38	MC3T3-E1	OS & ss	21	2.7	rightish mid bottom - image 14
39	MC3T3-E1	OS & ss	21	2.7	mid - image 15
40	MC3T3-E1	OS & ss	21	2.9	left mid - image 15
41	MC3T3-E1	OS & ss	21	3.3	right mid edge - image 15
42	MC3T3-E1	OS & ss	21	2.5	right bottom corner - image 15
43	MC3T3-E1	OS & ss	21	2.7	mid top edge - image 15
44	MC3T3-E1	OS & ss	21	4.3	mid lower - image 16
45	MC3T3-E1	OS & ss	21	4.3	left of no. 44 - image 16
46	MC3T3-E1	OS & ss	21	3.6	left upper - image 16
47	MC3T3-E1	OS & ss	21	3.1	mid top - image 16
48	MC3T3-E1	OS & ss	21	3.1	above no. 44 - image 16
49	MC3T3-E1	OS & ss	21	3.2	right lower edge - image 17
50	MC3T3-E1	OS & ss	21	3.4	right upper corner - image 17
51	MC3T3-E1	OS & ss	21	3.2	leftish mid top - image 17
52	MC3T3-E1	OS & ss	21	2.7	left top edge - image 17
53	MC3T3-E1	OS & ss	21	4.3	right bottom - image 18
54	MC3T3-E1	OS & ss	21	3	right top edge - image 18
55	MC3T3-E1	OS & ss	21	3.9	left mid - image 18
56	MC3T3-E1	OS & ss	21	2.7	left of no. 55 - image 18
57	MC3T3-E1	OS & ss	21	3	leftish mid - image 19
58	MC3T3-E1	OS & ss	21	3.1	top leftish mid - image 19
59	MC3T3-E1	OS & ss	21	5	left mid - image 19
60	MC3T3-E1	OS & ss	21	3.3	right & below no. 59 - image 19
61	MC3T3-E1	OS & ss	21	3.7	right mid edge - image 19
62	MC3T3-E1	OS & ss	21	3	right lower corner - image 19
63	MC3T3-E1	OS & ss	21	3	right mid - image 19
64	MC3T3-E1	OS & ss	21	2.9	mid - image 20
65	MC3T3-E1	OS & ss	21	3.3	right upper - image 20
66	MC3T3-E1	OS & ss	21	2.3	right mid - image 20
67	MC3T3-E1	OS & ss	21	2.6	left bottom - image 20
68	MC3T3-E1	OS & ss	21	2.9	mid - image 21
69	MC3T3-E1	OS & ss	21	3.1	mid upper - image 21
70	MC3T3-E1	OS & ss	21	3.8	left of no. 69 - image 21
71	MC3T3-E1	OS & ss	21	3.3	left of no. 70 - image 21
72	MC3T3-E1	OS & ss	21	2.9	left upper - image 21
73	MC3T3-E1	OS & ss	21	4.2	left mid - image 21
74	MC3T3-E1	OS & ss	21	2.5	lower left - image 21
75	MC3T3-E1	OS & ss	21	3.5	right lower - image 21
76	MC3T3-E1	OS & ss	21	2.8	right of no. 75 - image 21
77	MC3T3-E1	OS & ss	21	3.9	right mid edge - image 22
78	MC3T3-E1	OS & ss	21	3	mid - image 22
79	MC3T3-E1	OS & ss	21	3.7	mid top edge - image 22
80	MC3T3-E1	OS & ss	21	3.3	right bottom corner - image 23
81	MC3T3-E1	OS & ss	21	3	right upper - image 23
82	MC3T3-E1	OS & ss	21	2.8	left lower - image 23
83	MC3T3-E1	OS & ss	21	3.4	left upper - image 23	set 3
84	MC3T3-E1	OS & ss	21	3.1	right upper - image 24
85	MC3T3-E1	OS & ss	21	3.1	right lower - image 24
86	MC3T3-E1	OS & ss	21	2.9	left bottom corner - image 24
87	MC3T3-E1	OS & ss	21	3.8	right lower edge - image 25
88	MC3T3-E1	OS & ss	21	3.5	left upper edge - image 25
89	MC3T3-E1	OS & ss	21	3.1	right of no. 87 - image 25
90	MC3T3-E1	OS & ss	21	3.7	left upper - image 26
91	MC3T3-E1	OS & ss	21	3.6	left of no. 89 - image 26
92	MC3T3-E1	OS & ss	21	4.4	mid bottom - image 27
93	MC3T3-E1	OS & ss	21	2.9	rightish mid - image 27
94	MC3T3-E1	OS & ss	21	3.6	upper left - image 28
95	MC3T3-E1	OS & ss	21	2.4	mid lower - image 28
96	MC3T3-E1	OS & ss	21	2.9	right lower corner - image 28
97	MC3T3-E1	OS & ss	21	2.9	right lower corner - image 28
98	MC3T3-E1	OS & ss	21	3.1	mid - image 29
99	MC3T3-E1	OS & ss	21	3.5	mid upper - image 29
100	MC3T3-E1	OS & ss	21	3.7	right bottom corner - image 29
101	MC3T3-E1	OS & ss	21	3.8	right mid edge - image 29
102	MC3T3-E1	OS & ss	21	3.1	left upper corner - image 30
103	MC3T3-E1	OS & ss	21	4	below right of 101 - image 30
104	MC3T3-E1	OS & ss	21	2.2	mid lower - image 30
105	MC3T3-E1	OS & ss	21	2.7	mid leftish - image 30
106	MC3T3-E1	OS & ss	21	2.9	left mid lower - image 30
107	MC3T3-E1	OS & ss	21	3	left mid - image 31
108	MC3T3-E1	OS & ss	21	3	right mid - image 31
109	MC3T3-E1	OS & ss	21	2.9	left lower mid - image 32
110	MC3T3-E1	OS & ss	21	3	right lower mid - image 32
111	MC3T3-E1	OS & ss	21	2.9	mid - image 32
112	MC3T3-E1	OS & ss	21	3.4	mid upper - image 33
113	MC3T3-E1	OS & ss	21	3.1	left of no. 111 - image 33
114	MC3T3-E1	OS & ss	21	2.8	left edge - image 33
115	MC3T3-E1	OS & ss	21	3.3	mid - image 34
116	MC3T3-E1	OS & ss	21	3.3	mid top - image 34
117	MC3T3-E1	OS & ss	21	3.2	right lower mid - image 34
118	MC3T3-E1	OS & ss	21	3	right mid - image 34
119	MC3T3-E1	OS & ss	21	3	mid - image 35
120	MC3T3-E1	OS & ss	21	3	above no. 118 - image 35
121	MC3T3-E1	OS & ss	21	3	left of no. 119 - image 35
122	MC3T3-E1	OS & ss	21	3	left mid - image 35
123	MC3T3-E1	OS & ss	21	3.6	left mid lower - image 35
124	MC3T3-E1	OS & ss	21	2.6	below no. 122 - image 35
125	MC3T3-E1	OS & ss	21	2.7	right upper - image 35

## Sheet: Mean cilia length
	Cilia length (µm)
	Day 0 uninduced no ss	Day 0 uninduced	Day 7 uninduced	Day 7 OS	Day 14 uninduced	Day 14 OS	Day 21 uninduced	Day 21 OS
Mean	2.216	2.875	3.225	3.375	3.266	3.937	2.647	3.134
SEM	0.02817	0.05393	0.04675	0.04726	0.0449	0.05726	0.03542	0.04519

## Sheet: PC no.
Cell line	Treatment	No. of cells	Cells with PC	% Cells with PC			Percent cilia
MC3T3-E1	day 0 uninduced no ss	95	71	74.7			Day 0 uninduced no ss	Day 0 uninduced	Day 7 uninduced	Day 7 OS	Day 14 uninduced	Day 14 OS	Day 21 uninduced	Day 21 OS
MC3T3-E1	day 0 uninduced no ss	112	91	81.3
MC3T3-E1	day 0 uninduced no ss	119	105	88.2		Mean	81.4	91.27	86.63	88.2	87.53	90.23	91.4	72.5
	Total	326				SEM	3.897	1.419	1.426	0.6807	0.8192	1.507	1.185	0.6083
MC3T3-E1	day 0 uninduced ss	117	107	91.5		PC: primary cilia
MC3T3-E1	day 0 uninduced ss	110	103	93.6		ss: serum starved
MC3T3-E1	day 0 uninduced ss	106	94	88.7
	Total	333
MC3T3-E1	day 7 uninduced ss	200	174	87
MC3T3-E1	day 7 uninduced ss	235	209	88.9
MC3T3-E1	day 7 uninduced ss	100	84	84
	Total	535
MC3T3-E1	Day 7 OS & ss	278	248	89.2
MC3T3-E1	Day 7 OS & ss	275	239	86.9
MC3T3-E1	Day 7 OS & ss	96	85	88.5
	Total	649
MC3T3-E1	day 14 uninduced ss	276	245	88.8
MC3T3-E1	day 14 uninduced ss	336	289	86
MC3T3-E1	day 14 uninduced ss	98	86	87.8
	Total	710
MC3T3-E1	Day 14 OS & ss	273	253	92.7
MC3T3-E1	Day 14 OS & ss	326	295	90.5
MC3T3-E1	Day 14 OS & ss	95	84	87.5
	Total	694
MC3T3-E1	Day 21 uninduced & ss	81	73	91.5
MC3T3-E1	Day 21 uninduced & ss	106	99	93.4
MC3T3-E1	Day 21 uninduced & ss	168	150	89.3
	Total	355
MC3T3-E1	Day 21 OS & ss	135	98	72.6
MC3T3-E1	Day 21 OS & ss	226	166	73.5
MC3T3-E1	Day 21 OS & ss	175	125	71.4
	Total	536
					Total
					Total
